# Supplementary material for: A concise approach to the spiroiminal fragment of marineosins
Source: Royal Society of Chemistry journal article supplement (doi:10.1039/c3ob40208h), 2013-01-01

## **A concise approach to the spiroiminal fragment of marineosins**

**Guang Li,<sup>a</sup> Xun Zhang,<sup>a</sup> Qi Li,<sup>a</sup> Pengju Feng<sup>a</sup> and Yian Shi<sup>\*a,b</sup>**

*<sup>a</sup> Beijing National Laboratory for Molecular Sciences, CAS Key Laboratory of Molecular Recognition and Function, Institute of Chemistry, Chinese Academy of Sciences, Beijing 100190, China.*

*<sup>b</sup> Department of Chemistry, Colorado State University, Fort Collins, Colorado 80523, United States*

### **Supporting Information**

**General Procedures.** All commercially available reagents were used without further purification unless otherwise stated. All dry solvents were freshly distilled under nitrogen from appropriate drying agents.  $\text{CH}_2\text{Cl}_2$  was distilled from  $\text{CaH}_2$  and pyrrole was distilled under  $\text{N}_2$ . Column chromatography was performed on silica gel (200-300 mesh).  $^1\text{H}$  NMR spectra were recorded on a 400 MHz NMR spectrometer and  $^{13}\text{C}$  NMR spectra were recorded on a 100 MHz NMR spectrometer. IR spectra were recorded on a FT-IR spectrometer. Melting points were uncorrected.

### Synthesis of Compound 5

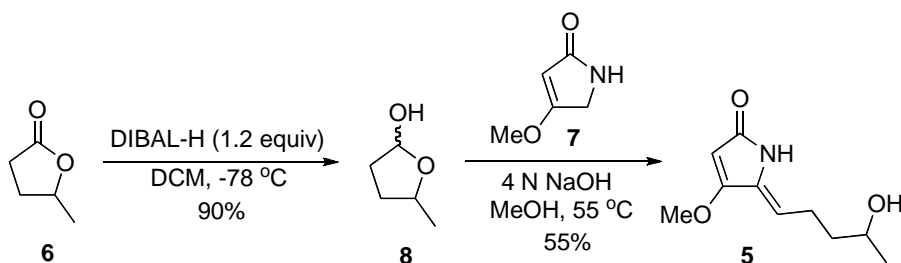

To a solution of  $\gamma$ -valerolactone (**6**) (7.51 g, 75.0 mmol) in dry DCM (200 mL) at  $-78$  °C under  $\text{N}_2$  was added dropwise a solution of diisobutylaluminum hydride (69.2 mL, 90.0 mmol, 1.3 M in hexanes) via syringe pump over 2 h. Upon stirring at  $-78$  °C for 1 h, the reaction mixture was quenched with MeOH (20 mL) and a saturated solution of Rochelle's salt (200 mL) at  $-78$  °C, stirred at rt for 2 h, and filtered through a Celite pad. The filtrate was extracted with DCM (3 x 300 mL), washed with brine (3 x 100 mL), and concentrated to give compound **8** as a light yellow oil (6.92 g, 90%), which was used directly without further purification.

L. A. Paquette, J. C. Lanter and H-L. Wang, *J. Org. Chem.*, 1996, **61**, 1119.

To a solution of compound **7** (8.40 g, 74.4 mmol) in 4 N NaOH (110 mL) at  $55$  °C was added dropwise a solution of **8** (6.90 g, 67.6 mol) in MeOH (110 mL). The resulting mixture was stirred at  $55$  °C overnight, cooled to rt, concentrated, and stored in a refrigerator ( $0$  °C) for 24 h. The resulting precipitate was filtered and washed with water to give compound **5** as a white solid (7.28 g, 55%).  $R_f = 0.24$  (silica gel, EtOAc); mp.  $84$ - $86$  °C;

IR (film): 3355, 1664, 1598  $\text{cm}^{-1}$ ;  $^1\text{H}$  NMR ( $\text{CDCl}_3$ , 400 MHz)  $\delta$  9.64 (s, 1H), 5.52 (t,  $J$  = 8.8 Hz, 1H), 5.11 (s, 1H), 3.81 (s, 3H), 3.84-3.73 (m, 1H), 3.47 (s, 1H), 2.46-2.30 (m, 2H), 1.65-1.53 (m, 2H), 1.18 (d,  $J$  = 6.4 Hz, 3H);  $^{13}\text{C}$  NMR (100 MHz,  $\text{CDCl}_3$ )  $\delta$  173.3, 166.5, 134.2, 111.5, 92.9, 66.7, 58.2, 38.5, 23.8, 23.4; HRMS Calcd for  $\text{C}_{10}\text{H}_{15}\text{NO}_3$  ( $\text{M}^+$ ): 197.1052; Found: 197.1054.

(a) T. M. Visp, US4983743., 1991.

(b) M. Bänziger, J. F McGarrity, and T. Meul, *J. Org. Chem.*, 1993, **58**, 4010.

### Synthesis of Compound 9

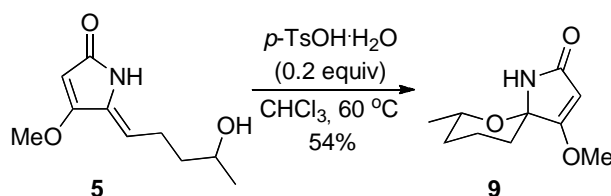

A solution of compound **5** (0.197 g, 1.00 mmol) and  $p\text{-TsOH}\cdot\text{H}_2\text{O}$  (0.038 g, 0.20 mmol) in  $\text{CHCl}_3$  (16 mL) was stirred at 60  $^\circ\text{C}$  for 24 h, cooled to rt, quenched with  $\text{NEt}_3$  (0.5 mL), concentrated, and purified by flash column chromatography (silica gel, eluent: EtOAc) to give compound **9** as a white solid (0.106 g, 54%).  $R_f$  = 0.36 (silica gel, EtOAc); mp. 177-180  $^\circ\text{C}$ ; IR (film): 3232, 1676, 1597  $\text{cm}^{-1}$ ;  $^1\text{H}$  NMR ( $\text{CDCl}_3$ , 400 MHz)  $\delta$  7.70 (br, 1H), 4.96 (s, 1H), 3.85 (s, 3H), 3.83-3.74 (m, 1H), 2.04-1.87 (m, 2H), 1.83-1.66 (m, 2H), 1.60-1.53 (m, 1H), 1.40-1.28 (m, 1H), 1.21 (d,  $J$  = 6.0 Hz, 3H);  $^{13}\text{C}$  NMR (100 MHz,  $\text{CDCl}_3$ )  $\delta$  176.8, 174.0, 92.6, 88.3, 70.7, 58.8, 32.1, 30.9, 22.2, 20.0; HRMS Calcd for  $\text{C}_{10}\text{H}_{15}\text{NO}_3$  ( $\text{M}^+$ ): 197.1052; Found: 197.1055.

### Synthesis of Compound 4a and 4b

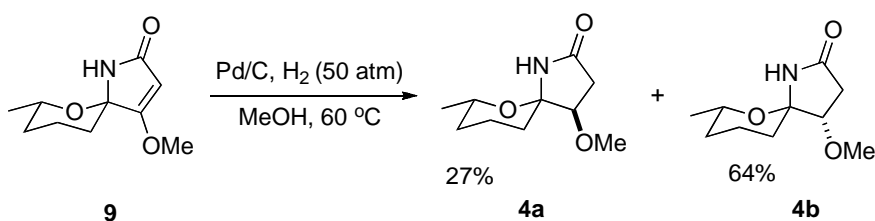

A mixture of compound **9** (0.099 g, 0.50 mmol) and 10% Pd/C (50%  $\text{H}_2\text{O}$ ) (0.02 g) in

MeOH (3 mL) was stirred under H<sub>2</sub> atmosphere (50 atm) at 60 °C for 24 h, cooled to rt, filtered through a basic alumina pad, concentrated, and purified by flash column chromatography (silica gel, eluent: PE/EtOAc/NEt<sub>3</sub> = 2/1/0.01 to 1/1/0.01) to give compound **4a** (0.0271 g, 27%) and **4b** (0.0635 g, 64%).

**4a**: white solid;  $R_f = 0.43$  (silica gel, PE/EtOAc = 1/2); mp. 146-149 °C; IR (film): 3351, 3183, 1710 cm<sup>-1</sup>; <sup>1</sup>H NMR (CDCl<sub>3</sub>, 400 MHz)  $\delta$  7.69 (br, 1H), 3.71-3.61 (m, 2H), 3.36 (s, 3H), 2.74 (dd,  $J = 17.2, 5.6$  Hz, 1H), 2.30 (dd,  $J = 17.2, 2.0$  Hz, 1H), 1.89-1.80 (m, 2H), 1.73-1.51 (m, 3H), 1.31-1.19 (m, 1H), 1.12 (d,  $J = 6.4$  Hz, 3H); <sup>13</sup>C NMR (100 MHz, CDCl<sub>3</sub>)  $\delta$  177.5, 92.5, 84.0, 68.0, 57.7, 36.1, 32.9, 29.1, 22.2, 19.8; HRMS Calcd for C<sub>10</sub>H<sub>17</sub>NO<sub>3</sub> (M<sup>+</sup>): 199.1208; Found: 199.1211.

**4b**: white solid;  $R_f = 0.17$  (silica gel, PE/EtOAc = 1/2); mp. 148-152 °C; IR (film): 3355, 3184, 1681 cm<sup>-1</sup>; <sup>1</sup>H NMR (MeOD, 400 MHz)  $\delta$  3.81-3.68 (m, 2H), 3.45 (s, 3H), 2.58 (dd,  $J = 16.0, 7.2$  Hz, 1H), 2.44 (dd,  $J = 16.0, 9.2$  Hz, 1H), 1.97-1.87 (m, 1H), 1.86-1.72 (m, 2H), 1.66-1.56 (m, 2H), 1.33-1.20 (m, 1H), 1.16 (d,  $J = 6.4$  Hz, 3H); <sup>13</sup>C NMR (100 MHz, MeOD)  $\delta$  177.1, 90.2, 83.1, 69.1, 58.6, 36.0, 33.4, 33.0, 22.1, 20.8; HRMS Calcd for C<sub>10</sub>H<sub>17</sub>NO<sub>3</sub> (M<sup>+</sup>): 199.1208; Found: 199.1210.

### Synthesis of Compound **4c**

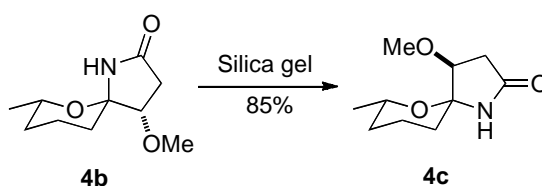

Compound **4b** (0.030 g, 0.15 mmol) was loaded onto a silica gel column and eluted slowly with PE/EtOAc = 1/1 to give compound **4c** as a white solid (0.0255 g, 85%).  $R_f = 0.4$  (silica gel, EtOAc); mp. 163-167 °C; IR (film): 3205, 2933, 1709 cm<sup>-1</sup>; <sup>1</sup>H NMR (CDCl<sub>3</sub>, 400 MHz)  $\delta$  5.78 (s, 1H), 3.98 (d,  $J = 5.6$  Hz, 1H), 3.78-3.68 (m, 1H), 3.34 (s, 3H), 2.69 (dd,  $J = 17.2, 5.6$  Hz, 1H), 2.36-2.29 (m, 1H), 2.27-2.19 (m, 1H), 1.82-1.73 (m, 1H), 1.65-1.50 (m, 3H), 1.39-1.28 (m, 1H), 1.17 (d,  $J = 6.4$  Hz, 3H); <sup>13</sup>C NMR (100 MHz,

$\text{CDCl}_3$ )  $\delta$  176.0, 92.1, 77.3, 70.6, 56.9, 35.3, 32.1, 28.9, 22.3, 20.7; HRMS Calcd for  $\text{C}_{10}\text{H}_{18}\text{NO}_3$  ( $\text{M}+\text{H}$ ): 200.1281; Found: 200.1283.

### Synthesis of Compound 3a

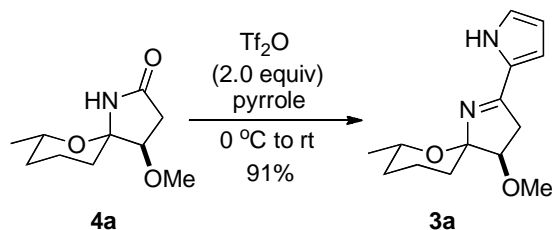

To a solution of compound **4a** (0.0200 g, 0.10 mmol) in freshly distilled pyrrole (1 mL) under  $\text{N}_2$  at  $0^\circ\text{C}$  was added dropwise  $\text{Tf}_2\text{O}$  (0.0336 mL, 0.0564 g, 0.20 mmol). Upon stirring at rt for 3 h, the reaction mixture was quenched with 1 N NaOH (1 mL), extracted with DCM (3 x 10 mL), washed with water (3 x 5 mL) and brine (3 x 5 mL), dried over  $\text{Na}_2\text{SO}_4$ , filtered, concentrated, and purified by flash column chromatography (silica gel, eluent: PE/EtOAc = 4/1) to give compound **3a** as a light yellow solid (0.0226 g, 91%).  $R_f$  = 0.2 (silica gel, PE/EtOAc = 4/1); mp.  $68\text{--}70^\circ\text{C}$ ; IR (film):  $3133, 1606\text{ cm}^{-1}$ ;  $^1\text{H}$  NMR ( $\text{CDCl}_3$ , 400 MHz)  $\delta$  6.89 (dd,  $J = 2.4, 1.2$  Hz, 1H), 6.55 (dd,  $J = 3.6, 1.6$  Hz, 1H), 6.21 (dd,  $J = 3.6, 2.8$  Hz, 1H), 4.27–4.18 (m, 1H), 3.83 (dd,  $J = 7.2, 6.4$  Hz, 1H), 3.44 (s, 3H), 3.20 (dd,  $J = 16.4, 6.8$  Hz, 1H), 2.74 (dd,  $J = 16.4, 5.6$  Hz, 1H), 2.07–1.92 (m, 1H), 1.83–1.68 (m, 2H), 1.68–1.60 (m, 1H), 1.60–1.52 (m, 1H), 1.38–1.23 (m, 1H), 1.10 (d,  $J = 6.4$  Hz, 3H);  $^{13}\text{C}$  NMR (100 MHz,  $\text{CDCl}_3$ )  $\delta$  163.4, 128.0, 122.5, 113.9, 109.9, 103.7, 87.2, 68.7, 58.3, 38.8, 33.7, 29.0, 22.6, 20.0; HRMS Calcd for  $\text{C}_{14}\text{H}_{20}\text{N}_2\text{O}_2$  ( $\text{M}^+$ ): 248.1525; Found: 248.1528.

### Synthesis of Compound 3b and 3c

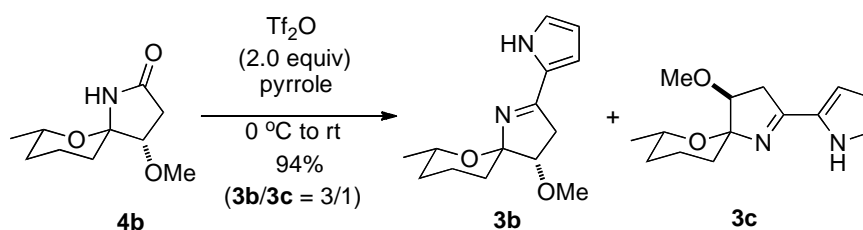

To a solution of compound **4b** (0.0200 g, 0.10 mmol) in freshly distilled pyrrole (1 mL) under N<sub>2</sub> at 0 °C was added dropwise Tf<sub>2</sub>O (0.0336 mL, 0.0564 g, 0.20 mmol). Upon stirring at rt for 3 h, the reaction mixture was quenched with 2 N NaOH (2 mL), extracted with DCM (3 x 10 mL), washed with water (3 x 5 mL) and brine (3 x 5 mL), dried over Na<sub>2</sub>SO<sub>4</sub>, filtered, concentrated to give a mixture of **3b** and **3c** (3:1 as judged by <sup>1</sup>H NMR), which was purified by repeated flash column chromatography (silica gel, eluent: PE/EtOAc/NEt<sub>3</sub> = 4/1/0.01) to give compound **3b** (0.0167 g, 67%) and **3c** (0.0027 g, 11%) along with a mixture of **3b** and **3c** (0.0039 g, 16%) (94% combined yield).

### Synthesis of Compound **3c**

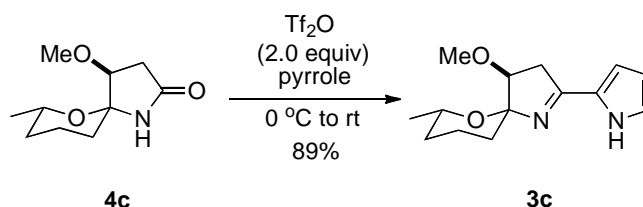

To a solution of compound **4c** (0.0150 g, 0.075 mmol) in freshly distilled pyrrole (0.75 mL) under N<sub>2</sub> at 0 °C was added dropwise Tf<sub>2</sub>O (0.0255 mL, 0.0425 g, 0.15 mmol). Upon stirring at rt for 3 h, the reaction mixture was quenched with 1 N NaOH (2 mL), extracted with DCM (3 x 20 mL), washed with water (3 x 10 mL) and brine (3 x 10 mL), dried over Na<sub>2</sub>SO<sub>4</sub>, filtered, concentrated, and purified by flash column chromatography (silica gel, eluent: PE/EtOAc = 4/1) to give compound **3c** (0.0166 g, 89%).

**3b**: light yellow solid; *R<sub>f</sub>* = 0.2 (silica gel, PE/EtOAc = 1/2); mp. 120-123 °C; IR (film): 3261, 1609 cm<sup>-1</sup>; <sup>1</sup>H NMR (CDCl<sub>3</sub>, 400 MHz) δ 6.92 (dd, *J* = 2.4, 1.2 Hz, 1H), 6.55 (dd, *J* = 3.6, 1.2 Hz, 1H), 6.23 (dd, *J* = 3.6, 2.8 Hz, 1H), 4.33-4.24 (m, 1H), 3.70 (dd, *J* = 6.0, 4.4 Hz, 1H), 3.49 (s, 3H), 3.03 (dd, *J* = 16.4, 6.0 Hz, 1H), 2.96 (dd, *J* = 16.4, 4.4 Hz, 1H), 2.11-1.96 (m, 1H), 1.82-1.63 (m, 3H), 1.50-1.29 (m, 2H), 1.19 (d, *J* = 6.4 Hz, 3H); <sup>13</sup>C NMR (100 MHz, CDCl<sub>3</sub>) δ 163.5, 128.1, 122.2, 113.7, 110.1, 101.1, 85.6, 68.6, 59.0, 39.0, 34.6, 33.4, 22.5, 20.6; HRMS Calcd for C<sub>14</sub>H<sub>20</sub>N<sub>2</sub>O<sub>2</sub> (M<sup>+</sup>): 248.1525; Found: 248.1528.

**3c**: light yellow solid;  $R_f = 0.3$  (silica gel, PE/EtOAc = 1/2); mp. 149-152 °C; IR (film): 3125, 1612  $\text{cm}^{-1}$ ;  $^1\text{H}$  NMR ( $\text{CDCl}_3$ , 400 MHz)  $\delta$  6.93 (dd,  $J = 2.4, 1.2$  Hz, 1H), 6.56 (dd,  $J = 3.6, 1.2$  Hz, 1H), 6.22 (dd,  $J = 3.2, 2.4$  Hz, 1H), 4.07 (dd,  $J = 6.4, 3.2$  Hz, 1H), 3.82-3.72 (m, 1H), 3.38 (s, 3H), 3.25 (dd,  $J = 17.2, 6.4$  Hz, 1H), 2.86 (dd,  $J = 17.2, 3.6$  Hz, 1H), 2.06-2.00 (m, 1H), 1.82-1.69 (m, 3H), 1.64-1.57 (m, 1H), 1.40-1.29 (m, 1H), 1.21 (d,  $J = 6.0$  Hz, 3H);  $^{13}\text{C}$  NMR (100 MHz,  $\text{CDCl}_3$ )  $\delta$  164.7, 127.4, 122.8, 114.3, 109.9, 105.3, 83.3, 70.3, 57.7, 39.7, 32.6, 29.4, 22.6, 21.0; HRMS Calcd for  $\text{C}_{14}\text{H}_{20}\text{N}_2\text{O}_2$  ( $\text{M}^+$ ): 248.1525; Found: 248.1528.

### The X-ray structure of compound 9

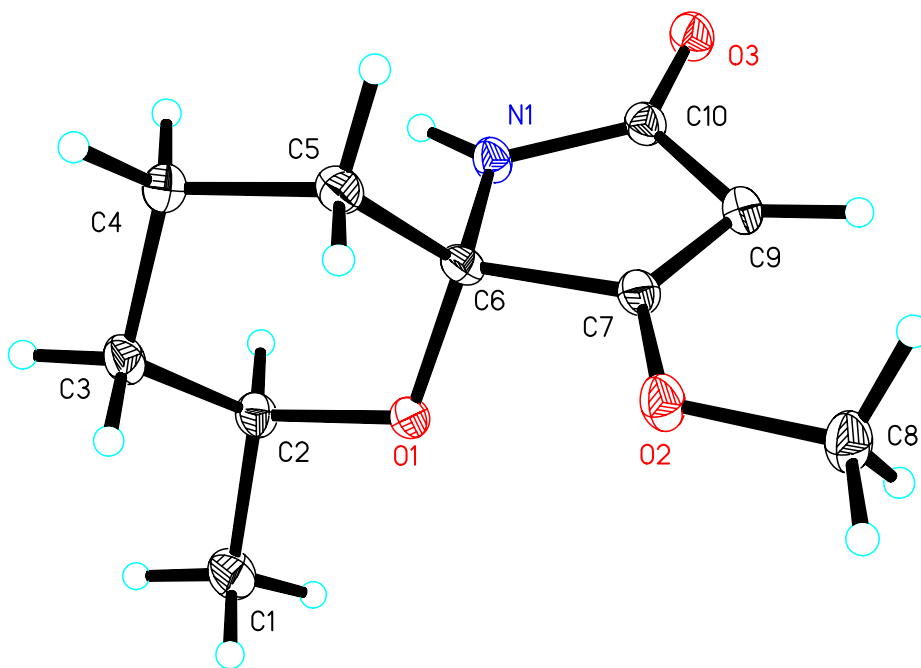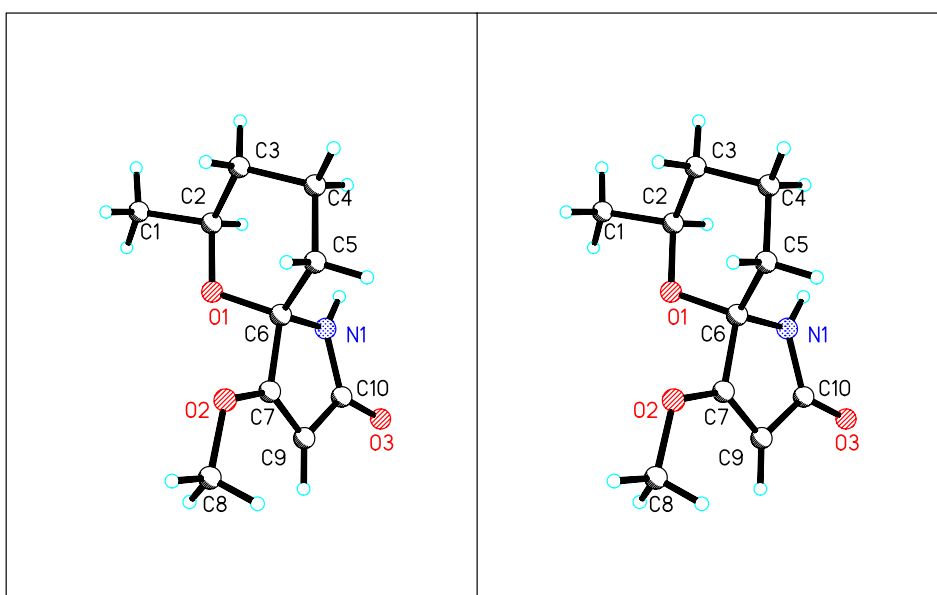



Table 1. Crystal data and structure refinement for A.

|                                   |                                                                                                                        |
|-----------------------------------|------------------------------------------------------------------------------------------------------------------------|
| Identification code               | a                                                                                                                      |
| Empirical formula                 | C <sub>10</sub> H <sub>15</sub> N O <sub>3</sub>                                                                       |
| Formula weight                    | 197.23                                                                                                                 |
| Temperature                       | 173(2) K                                                                                                               |
| Wavelength                        | 0.71073 Å                                                                                                              |
| Crystal system, space group       | Monoclinic, P2(1)/n                                                                                                    |
| Unit cell dimensions              | a = 7.6770(15) Å    alpha = 90 deg.<br>b = 14.890(3) Å    beta = 105.14(3) deg.<br>c = 8.9195(18) Å    gamma = 90 deg. |
| Volume                            | 984.2(3) Å <sup>3</sup>                                                                                                |
| Z, Calculated density             | 4, 1.331 Mg/m <sup>3</sup>                                                                                             |
| Absorption coefficient            | 0.098 mm <sup>-1</sup>                                                                                                 |
| F(000)                            | 424                                                                                                                    |
| Crystal size                      | 0.26 x 0.15 x 0.12 mm                                                                                                  |
| Theta range for data collection   | 2.73 to 27.50 deg.                                                                                                     |
| Limiting indices                  | -9<=h<=9, -19<=k<=19, -11<=l<=11                                                                                       |
| Reflections collected / unique    | 6514 / 2255 [R(int) = 0.0471]                                                                                          |
| Completeness to theta = 27.50     | 99.6 %                                                                                                                 |
| Absorption correction             | Semi-empirical from equivalents                                                                                        |
| Max. and min. transmission        | 1.0000 and 0.7155                                                                                                      |
| Refinement method                 | Full-matrix least-squares on F <sup>2</sup>                                                                            |
| Data / restraints / parameters    | 2255 / 0 / 129                                                                                                         |
| Goodness-of-fit on F <sup>2</sup> | 1.166                                                                                                                  |
| Final R indices [I>2sigma(I)]     | R1 = 0.0615, wR2 = 0.1283                                                                                              |
| R indices (all data)              | R1 = 0.0695, wR2 = 0.1326                                                                                              |
| Largest diff. peak and hole       | 0.359 and -0.331 e.Å <sup>-3</sup>                                                                                     |

Table 2. Atomic coordinates ( $\times 10^4$ ) and equivalent isotropic displacement parameters ( $\text{\AA}^2 \times 10^3$ ) for A.  
U(eq) is defined as one third of the trace of the orthogonalized Uij tensor.

|       | x        | y        | z       | U(eq) |
|-------|----------|----------|---------|-------|
| O(1)  | 9791(2)  | 8851(1)  | 2477(1) | 23(1) |
| O(2)  | 8764(2)  | 8632(1)  | 5256(2) | 28(1) |
| O(3)  | 5103(2)  | 10697(1) | 1766(2) | 31(1) |
| N(1)  | 6853(2)  | 9485(1)  | 1483(2) | 24(1) |
| C(1)  | 12175(3) | 8717(2)  | 1280(3) | 35(1) |
| C(2)  | 10170(3) | 8587(1)  | 1037(2) | 24(1) |
| C(3)  | 9542(3)  | 7628(1)  | 635(2)  | 26(1) |
| C(4)  | 7546(3)  | 7533(1)  | 543(2)  | 27(1) |
| C(5)  | 7206(3)  | 7853(1)  | 2064(2) | 25(1) |
| C(6)  | 7934(2)  | 8800(1)  | 2465(2) | 21(1) |
| C(7)  | 7855(2)  | 9122(1)  | 4061(2) | 22(1) |
| C(8)  | 8778(3)  | 8985(1)  | 6761(2) | 30(1) |
| C(9)  | 6884(3)  | 9875(1)  | 3977(2) | 24(1) |
| C(10) | 6172(3)  | 10091(1) | 2325(2) | 24(1) |

Table 3. Bond lengths [Å] and angles [deg] for A.

---

|                  |            |
|------------------|------------|
| O(1)-C(6)        | 1.425(2)   |
| O(1)-C(2)        | 1.443(2)   |
| O(2)-C(7)        | 1.330(2)   |
| O(2)-C(8)        | 1.439(2)   |
| O(3)-C(10)       | 1.234(2)   |
| N(1)-C(10)       | 1.363(2)   |
| N(1)-C(6)        | 1.455(2)   |
| N(1)-H(1)        | 0.8800     |
| C(1)-C(2)        | 1.510(3)   |
| C(1)-H(1A)       | 0.9800     |
| C(1)-H(1C)       | 0.9800     |
| C(1)-H(1B)       | 0.9800     |
| C(2)-C(3)        | 1.519(3)   |
| C(2)-H(2)        | 1.0000     |
| C(3)-C(4)        | 1.520(3)   |
| C(3)-H(3B)       | 0.9900     |
| C(3)-H(3A)       | 0.9900     |
| C(4)-C(5)        | 1.524(3)   |
| C(4)-H(4A)       | 0.9900     |
| C(4)-H(4B)       | 0.9900     |
| C(5)-C(6)        | 1.524(3)   |
| C(5)-H(5B)       | 0.9900     |
| C(5)-H(5A)       | 0.9900     |
| C(6)-C(7)        | 1.518(2)   |
| C(7)-C(9)        | 1.337(3)   |
| C(8)-H(8B)       | 0.9800     |
| C(8)-H(8A)       | 0.9800     |
| C(8)-H(8C)       | 0.9800     |
| C(9)-C(10)       | 1.467(3)   |
| C(9)-H(9)        | 0.9500     |
| C(6)-O(1)-C(2)   | 114.35(14) |
| C(7)-O(2)-C(8)   | 114.91(15) |
| C(10)-N(1)-C(6)  | 111.91(15) |
| C(10)-N(1)-H(1)  | 124.0      |
| C(6)-N(1)-H(1)   | 124.0      |
| C(2)-C(1)-H(1A)  | 109.5      |
| C(2)-C(1)-H(1C)  | 109.5      |
| H(1A)-C(1)-H(1C) | 109.5      |
| C(2)-C(1)-H(1B)  | 109.5      |

|                  |            |
|------------------|------------|
| H(1A)-C(1)-H(1B) | 109.5      |
| H(1C)-C(1)-H(1B) | 109.5      |
| O(1)-C(2)-C(1)   | 105.78(15) |
| O(1)-C(2)-C(3)   | 109.95(15) |
| C(1)-C(2)-C(3)   | 113.78(17) |
| O(1)-C(2)-H(2)   | 109.1      |
| C(1)-C(2)-H(2)   | 109.1      |
| C(3)-C(2)-H(2)   | 109.1      |
| C(2)-C(3)-C(4)   | 110.72(16) |
| C(2)-C(3)-H(3B)  | 109.5      |
| C(4)-C(3)-H(3B)  | 109.5      |
| C(2)-C(3)-H(3A)  | 109.5      |
| C(4)-C(3)-H(3A)  | 109.5      |
| H(3B)-C(3)-H(3A) | 108.1      |
| C(3)-C(4)-C(5)   | 109.13(16) |
| C(3)-C(4)-H(4A)  | 109.9      |
| C(5)-C(4)-H(4A)  | 109.9      |
| C(3)-C(4)-H(4B)  | 109.9      |
| C(5)-C(4)-H(4B)  | 109.9      |
| H(4A)-C(4)-H(4B) | 108.3      |
| C(4)-C(5)-C(6)   | 111.18(16) |
| C(4)-C(5)-H(5B)  | 109.4      |
| C(6)-C(5)-H(5B)  | 109.4      |
| C(4)-C(5)-H(5A)  | 109.4      |
| C(6)-C(5)-H(5A)  | 109.4      |
| H(5B)-C(5)-H(5A) | 108.0      |
| O(1)-C(6)-N(1)   | 112.28(15) |
| O(1)-C(6)-C(7)   | 105.13(14) |
| N(1)-C(6)-C(7)   | 100.75(14) |
| O(1)-C(6)-C(5)   | 110.87(14) |
| N(1)-C(6)-C(5)   | 112.97(15) |
| C(7)-C(6)-C(5)   | 114.24(15) |
| O(2)-C(7)-C(9)   | 132.34(18) |
| O(2)-C(7)-C(6)   | 115.87(15) |
| C(9)-C(7)-C(6)   | 111.77(16) |
| O(2)-C(8)-H(8B)  | 109.5      |
| O(2)-C(8)-H(8A)  | 109.5      |
| H(8B)-C(8)-H(8A) | 109.5      |
| O(2)-C(8)-H(8C)  | 109.5      |
| H(8B)-C(8)-H(8C) | 109.5      |
| H(8A)-C(8)-H(8C) | 109.5      |
| C(7)-C(9)-C(10)  | 107.22(17) |
| C(7)-C(9)-H(9)   | 126.4      |
| C(10)-C(9)-H(9)  | 126.4      |

|                 |            |
|-----------------|------------|
| O(3)-C(10)-N(1) | 124.90(17) |
| O(3)-C(10)-C(9) | 126.89(18) |
| N(1)-C(10)-C(9) | 108.18(16) |

---

Symmetry transformations used to generate equivalent atoms:

Table 4. Anisotropic displacement parameters ( $\text{Å}^2 \times 10^3$ ) for A.

The anisotropic displacement factor exponent takes the form:

$$-2 \pi^2 [ h^2 a^{*2} U_{11} + \dots + 2 h k a^* b^* U_{12} ]$$

|       | U11   | U22   | U33   | U23   | U13   | U12   |
|-------|-------|-------|-------|-------|-------|-------|
| O(1)  | 20(1) | 29(1) | 20(1) | -3(1) | 8(1)  | 0(1)  |
| O(2)  | 35(1) | 29(1) | 20(1) | 3(1)  | 10(1) | 8(1)  |
| O(3)  | 33(1) | 28(1) | 30(1) | 0(1)  | 5(1)  | 11(1) |
| N(1)  | 26(1) | 26(1) | 19(1) | 2(1)  | 7(1)  | 6(1)  |
| C(1)  | 29(1) | 44(1) | 39(1) | -6(1) | 18(1) | -2(1) |
| C(2)  | 25(1) | 30(1) | 21(1) | 0(1)  | 11(1) | 1(1)  |
| C(3)  | 28(1) | 29(1) | 24(1) | -2(1) | 12(1) | 4(1)  |
| C(4)  | 27(1) | 24(1) | 30(1) | -5(1) | 7(1)  | 0(1)  |
| C(5)  | 23(1) | 25(1) | 30(1) | -1(1) | 10(1) | 1(1)  |
| C(6)  | 18(1) | 25(1) | 23(1) | 2(1)  | 8(1)  | 3(1)  |
| C(7)  | 22(1) | 25(1) | 21(1) | 1(1)  | 9(1)  | 0(1)  |
| C(8)  | 39(1) | 31(1) | 22(1) | 0(1)  | 11(1) | 4(1)  |
| C(9)  | 26(1) | 26(1) | 24(1) | -2(1) | 10(1) | 2(1)  |
| C(10) | 24(1) | 21(1) | 28(1) | -2(1) | 8(1)  | 0(1)  |

Table 5. Hydrogen coordinates ( $\times 10^4$ ) and isotropic displacement parameters ( $\text{\AA}^2 \times 10^3$ ) for A.

|       | x     | y     | z    | U(eq) |
|-------|-------|-------|------|-------|
| H(1)  | 6662  | 9505  | 467  | 28    |
| H(1A) | 12830 | 8335  | 2137 | 53    |
| H(1C) | 12484 | 9348  | 1533 | 53    |
| H(1B) | 12511 | 8554  | 329  | 53    |
| H(2)  | 9509  | 8996  | 189  | 29    |
| H(3B) | 10247 | 7215  | 1436 | 31    |
| H(3A) | 9759  | 7461  | -375 | 31    |
| H(4A) | 7177  | 6897  | 358  | 33    |
| H(4B) | 6825  | 7895  | -331 | 33    |
| H(5B) | 7796  | 7438  | 2910 | 30    |
| H(5A) | 5893  | 7846  | 1974 | 30    |
| H(8B) | 9525  | 8600  | 7569 | 45    |
| H(8A) | 7543  | 8999  | 6875 | 45    |
| H(8C) | 9275  | 9594  | 6863 | 45    |
| H(9)  | 6691  | 10208 | 4828 | 29    |

Table 6. Torsion angles [deg] for A.

---

|                      |             |
|----------------------|-------------|
| C(6)-O(1)-C(2)-C(1)  | 178.27(15)  |
| C(6)-O(1)-C(2)-C(3)  | -58.48(19)  |
| O(1)-C(2)-C(3)-C(4)  | 56.8(2)     |
| C(1)-C(2)-C(3)-C(4)  | 175.21(16)  |
| C(2)-C(3)-C(4)-C(5)  | -55.3(2)    |
| C(3)-C(4)-C(5)-C(6)  | 53.8(2)     |
| C(2)-O(1)-C(6)-N(1)  | -70.23(19)  |
| C(2)-O(1)-C(6)-C(7)  | -178.87(14) |
| C(2)-O(1)-C(6)-C(5)  | 57.19(19)   |
| C(10)-N(1)-C(6)-O(1) | -113.76(17) |
| C(10)-N(1)-C(6)-C(7) | -2.35(19)   |
| C(10)-N(1)-C(6)-C(5) | 119.95(18)  |
| C(4)-C(5)-C(6)-O(1)  | -54.2(2)    |
| C(4)-C(5)-C(6)-N(1)  | 72.8(2)     |
| C(4)-C(5)-C(6)-C(7)  | -172.80(15) |
| C(8)-O(2)-C(7)-C(9)  | -2.7(3)     |
| C(8)-O(2)-C(7)-C(6)  | 175.73(16)  |
| O(1)-C(6)-C(7)-O(2)  | -62.19(19)  |
| N(1)-C(6)-C(7)-O(2)  | -179.01(15) |
| C(5)-C(6)-C(7)-O(2)  | 59.6(2)     |
| O(1)-C(6)-C(7)-C(9)  | 116.54(17)  |
| N(1)-C(6)-C(7)-C(9)  | -0.3(2)     |
| C(5)-C(6)-C(7)-C(9)  | -121.69(18) |
| O(2)-C(7)-C(9)-C(10) | -178.99(19) |
| C(6)-C(7)-C(9)-C(10) | 2.6(2)      |
| C(6)-N(1)-C(10)-O(3) | -174.22(18) |
| C(6)-N(1)-C(10)-C(9) | 4.0(2)      |
| C(7)-C(9)-C(10)-O(3) | 174.14(19)  |
| C(7)-C(9)-C(10)-N(1) | -4.0(2)     |

---

Symmetry transformations used to generate equivalent atoms:



Table 7. Hydrogen bonds for A [A and deg.].

| D-H...A            | d(D-H) | d(H...A) | d(D...A) | <(DHA) |
|--------------------|--------|----------|----------|--------|
| N(1)-H(1)...O(3)#1 | 0.88   | 2.12     | 2.908(2) | 149.0  |

Symmetry transformations used to generate equivalent atoms:

#1 -x+1,-y+2,-z

### The X-ray structure of compound 4a

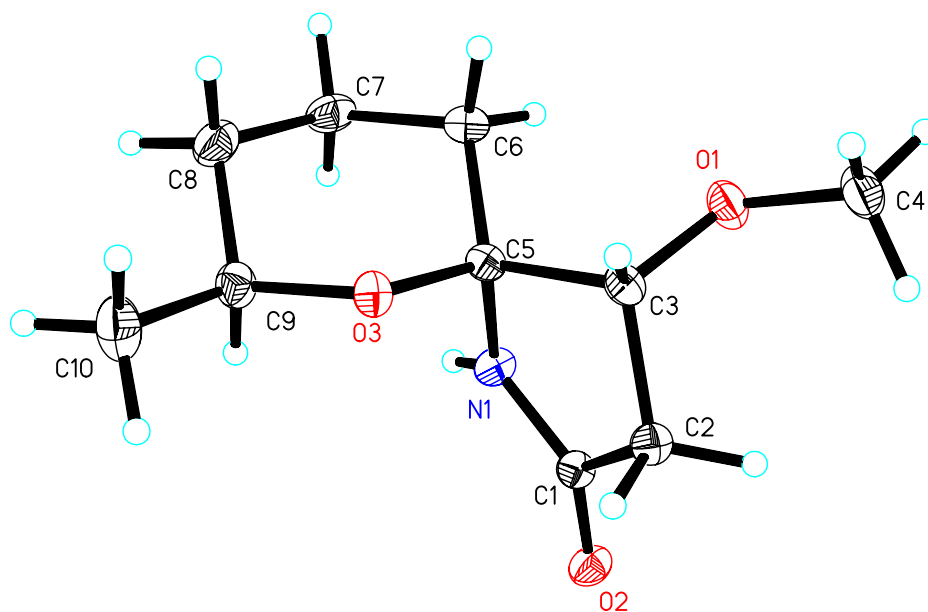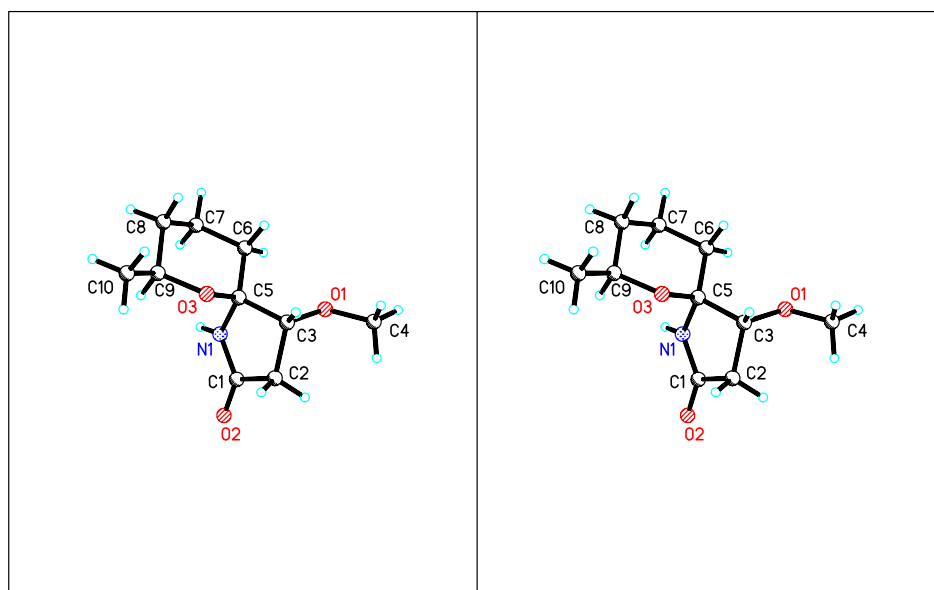

Table 1. Crystal data and structure refinement for A.

|                                   |                                                                                                                |
|-----------------------------------|----------------------------------------------------------------------------------------------------------------|
| Identification code               | a                                                                                                              |
| Empirical formula                 | C <sub>10</sub> H <sub>17</sub> N O <sub>3</sub>                                                               |
| Formula weight                    | 199.25                                                                                                         |
| Temperature                       | 173(2) K                                                                                                       |
| Wavelength                        | 0.71073 Å                                                                                                      |
| Crystal system, space group       | Orthorhombic, Pbc <sub>a</sub>                                                                                 |
| Unit cell dimensions              | a = 13.826(3) Å    alpha = 90 deg.<br>b = 9.5792(19) Å    beta = 90 deg.<br>c = 16.063(3) Å    gamma = 90 deg. |
| Volume                            | 2127.4(7) Å <sup>3</sup>                                                                                       |
| Z, Calculated density             | 8, 1.244 Mg/m <sup>3</sup>                                                                                     |
| Absorption coefficient            | 0.091 mm <sup>-1</sup>                                                                                         |
| F(000)                            | 864                                                                                                            |
| Crystal size                      | 0.16 x 0.14 x 0.10 mm                                                                                          |
| Theta range for data collection   | 2.54 to 27.48 deg.                                                                                             |
| Limiting indices                  | -17 ≤ h ≤ 17, -12 ≤ k ≤ 9, -20 ≤ l ≤ 20                                                                        |
| Reflections collected / unique    | 12526 / 2428 [R(int) = 0.0598]                                                                                 |
| Completeness to theta = 27.48     | 99.8 %                                                                                                         |
| Absorption correction             | Semi-empirical from equivalents                                                                                |
| Max. and min. transmission        | 1.0000 and 0.6676                                                                                              |
| Refinement method                 | Full-matrix least-squares on F <sup>2</sup>                                                                    |
| Data / restraints / parameters    | 2428 / 0 / 129                                                                                                 |
| Goodness-of-fit on F <sup>2</sup> | 1.191                                                                                                          |
| Final R indices [I > 2σ(I)]       | R <sub>1</sub> = 0.0610, wR <sub>2</sub> = 0.1202                                                              |
| R indices (all data)              | R <sub>1</sub> = 0.0722, wR <sub>2</sub> = 0.1253                                                              |
| Largest diff. peak and hole       | 0.227 and -0.168 e.Å <sup>-3</sup>                                                                             |

Table 2. Atomic coordinates ( $\times 10^4$ ) and equivalent isotropic displacement parameters ( $\text{\AA}^2 \times 10^3$ ) for A.  
U(eq) is defined as one third of the trace of the orthogonalized Uij tensor.

|       | x        | y       | z       | U(eq) |
|-------|----------|---------|---------|-------|
| O(1)  | -2114(1) | 8186(1) | 5951(1) | 35(1) |
| O(2)  | -488(1)  | 6154(1) | 4161(1) | 32(1) |
| O(3)  | 428(1)   | 8485(1) | 6197(1) | 26(1) |
| N(1)  | -332(1)  | 6536(1) | 5563(1) | 25(1) |
| C(1)  | -576(1)  | 6897(2) | 4783(1) | 25(1) |
| C(2)  | -979(1)  | 8358(2) | 4798(1) | 26(1) |
| C(3)  | -1174(1) | 8626(2) | 5721(1) | 25(1) |
| C(4)  | -2836(2) | 9168(3) | 5719(1) | 46(1) |
| C(5)  | -440(1)  | 7671(2) | 6160(1) | 23(1) |
| C(6)  | -724(1)  | 7162(2) | 7019(1) | 30(1) |
| C(7)  | 107(2)   | 6389(2) | 7440(1) | 36(1) |
| C(8)  | 1004(2)  | 7300(2) | 7436(1) | 38(1) |
| C(9)  | 1244(1)  | 7771(2) | 6561(1) | 30(1) |
| C(10) | 2081(2)  | 8782(2) | 6517(2) | 47(1) |

Table 3. Bond lengths [Å] and angles [deg] for A.

---

|                |            |
|----------------|------------|
| O(1)-C(3)      | 1.416(2)   |
| O(1)-C(4)      | 1.421(2)   |
| O(2)-C(1)      | 1.233(2)   |
| O(3)-C(5)      | 1.432(2)   |
| O(3)-C(9)      | 1.443(2)   |
| N(1)-C(1)      | 1.342(2)   |
| N(1)-C(5)      | 1.458(2)   |
| N(1)-H(1)      | 0.8800     |
| C(1)-C(2)      | 1.507(2)   |
| C(2)-C(3)      | 1.528(2)   |
| C(2)-H(2A)     | 0.9900     |
| C(2)-H(2B)     | 0.9900     |
| C(3)-C(5)      | 1.538(2)   |
| C(3)-H(3)      | 1.0000     |
| C(4)-H(4A)     | 0.9800     |
| C(4)-H(4B)     | 0.9800     |
| C(4)-H(4C)     | 0.9800     |
| C(5)-C(6)      | 1.515(2)   |
| C(6)-C(7)      | 1.525(3)   |
| C(6)-H(6A)     | 0.9900     |
| C(6)-H(6B)     | 0.9900     |
| C(7)-C(8)      | 1.517(3)   |
| C(7)-H(7B)     | 0.9900     |
| C(7)-H(7A)     | 0.9900     |
| C(8)-C(9)      | 1.513(3)   |
| C(8)-H(8A)     | 0.9900     |
| C(8)-H(8B)     | 0.9900     |
| C(9)-C(10)     | 1.510(3)   |
| C(9)-H(9)      | 1.0000     |
| C(10)-H(10A)   | 0.9800     |
| C(10)-H(10C)   | 0.9800     |
| C(10)-H(10B)   | 0.9800     |
| C(3)-O(1)-C(4) | 112.32(15) |
| C(5)-O(3)-C(9) | 114.43(13) |
| C(1)-N(1)-C(5) | 113.37(14) |
| C(1)-N(1)-H(1) | 123.3      |
| C(5)-N(1)-H(1) | 123.3      |
| O(2)-C(1)-N(1) | 125.64(16) |
| O(2)-C(1)-C(2) | 125.86(16) |

|                  |            |
|------------------|------------|
| N(1)-C(1)-C(2)   | 108.50(14) |
| C(1)-C(2)-C(3)   | 103.70(14) |
| C(1)-C(2)-H(2A)  | 111.0      |
| C(3)-C(2)-H(2A)  | 111.0      |
| C(1)-C(2)-H(2B)  | 111.0      |
| C(3)-C(2)-H(2B)  | 111.0      |
| H(2A)-C(2)-H(2B) | 109.0      |
| O(1)-C(3)-C(2)   | 111.40(14) |
| O(1)-C(3)-C(5)   | 108.01(13) |
| C(2)-C(3)-C(5)   | 103.24(13) |
| O(1)-C(3)-H(3)   | 111.3      |
| C(2)-C(3)-H(3)   | 111.3      |
| C(5)-C(3)-H(3)   | 111.3      |
| O(1)-C(4)-H(4A)  | 109.5      |
| O(1)-C(4)-H(4B)  | 109.5      |
| H(4A)-C(4)-H(4B) | 109.5      |
| O(1)-C(4)-H(4C)  | 109.5      |
| H(4A)-C(4)-H(4C) | 109.5      |
| H(4B)-C(4)-H(4C) | 109.5      |
| O(3)-C(5)-N(1)   | 110.32(13) |
| O(3)-C(5)-C(6)   | 110.80(14) |
| N(1)-C(5)-C(6)   | 112.74(14) |
| O(3)-C(5)-C(3)   | 104.35(13) |
| N(1)-C(5)-C(3)   | 102.04(13) |
| C(6)-C(5)-C(3)   | 115.98(14) |
| C(5)-C(6)-C(7)   | 111.37(15) |
| C(5)-C(6)-H(6A)  | 109.4      |
| C(7)-C(6)-H(6A)  | 109.4      |
| C(5)-C(6)-H(6B)  | 109.4      |
| C(7)-C(6)-H(6B)  | 109.4      |
| H(6A)-C(6)-H(6B) | 108.0      |
| C(8)-C(7)-C(6)   | 109.53(15) |
| C(8)-C(7)-H(7B)  | 109.8      |
| C(6)-C(7)-H(7B)  | 109.8      |
| C(8)-C(7)-H(7A)  | 109.8      |
| C(6)-C(7)-H(7A)  | 109.8      |
| H(7B)-C(7)-H(7A) | 108.2      |
| C(9)-C(8)-C(7)   | 110.80(16) |
| C(9)-C(8)-H(8A)  | 109.5      |
| C(7)-C(8)-H(8A)  | 109.5      |
| C(9)-C(8)-H(8B)  | 109.5      |
| C(7)-C(8)-H(8B)  | 109.5      |
| H(8A)-C(8)-H(8B) | 108.1      |
| O(3)-C(9)-C(10)  | 106.04(15) |

|                     |            |
|---------------------|------------|
| O(3)-C(9)-C(8)      | 110.29(15) |
| C(10)-C(9)-C(8)     | 113.75(17) |
| O(3)-C(9)-H(9)      | 108.9      |
| C(10)-C(9)-H(9)     | 108.9      |
| C(8)-C(9)-H(9)      | 108.9      |
| C(9)-C(10)-H(10A)   | 109.5      |
| C(9)-C(10)-H(10C)   | 109.5      |
| H(10A)-C(10)-H(10C) | 109.5      |
| C(9)-C(10)-H(10B)   | 109.5      |
| H(10A)-C(10)-H(10B) | 109.5      |
| H(10C)-C(10)-H(10B) | 109.5      |

---

Symmetry transformations used to generate equivalent atoms:

Table 4. Anisotropic displacement parameters ( $\text{Å}^2 \times 10^3$ ) for A.

The anisotropic displacement factor exponent takes the form:

$$-2 \pi^2 [ h^2 a^{*2} U_{11} + \dots + 2 h k a^* b^* U_{12} ]$$

|       | U11   | U22   | U33   | U23   | U13   | U12   |
|-------|-------|-------|-------|-------|-------|-------|
| O(1)  | 24(1) | 41(1) | 41(1) | 9(1)  | 4(1)  | 3(1)  |
| O(2)  | 40(1) | 29(1) | 26(1) | -4(1) | -3(1) | 8(1)  |
| O(3)  | 25(1) | 23(1) | 31(1) | 0(1)  | -2(1) | 0(1)  |
| N(1)  | 34(1) | 17(1) | 24(1) | 0(1)  | -1(1) | 4(1)  |
| C(1)  | 26(1) | 23(1) | 25(1) | 1(1)  | 1(1)  | 1(1)  |
| C(2)  | 30(1) | 21(1) | 28(1) | 2(1)  | 0(1)  | 3(1)  |
| C(3)  | 24(1) | 22(1) | 30(1) | 0(1)  | 3(1)  | 1(1)  |
| C(4)  | 30(1) | 60(2) | 47(1) | 12(1) | 6(1)  | 16(1) |
| C(5)  | 25(1) | 19(1) | 26(1) | -2(1) | 2(1)  | 1(1)  |
| C(6)  | 35(1) | 29(1) | 26(1) | -1(1) | 5(1)  | -1(1) |
| C(7)  | 48(1) | 34(1) | 24(1) | 4(1)  | 1(1)  | 5(1)  |
| C(8)  | 42(1) | 41(1) | 30(1) | 0(1)  | -8(1) | 7(1)  |
| C(9)  | 27(1) | 29(1) | 34(1) | 1(1)  | -3(1) | 6(1)  |
| C(10) | 32(1) | 51(1) | 60(1) | 9(1)  | -9(1) | 0(1)  |



Table 5. Hydrogen coordinates ( $\times 10^4$ ) and isotropic displacement parameters ( $\text{Å}^2 \times 10^3$ ) for A.

|        | x     | y     | z    | U(eq) |
|--------|-------|-------|------|-------|
| H(1)   | -127  | 5697  | 5699 | 30    |
| H(2A)  | -1583 | 8419  | 4469 | 31    |
| H(2B)  | -505  | 9036  | 4574 | 31    |
| H(3)   | -1065 | 9628  | 5867 | 30    |
| H(4A)  | -2685 | 10078 | 5965 | 69    |
| H(4B)  | -3468 | 8849  | 5921 | 69    |
| H(4C)  | -2854 | 9252  | 5111 | 69    |
| H(6A)  | -1289 | 6532  | 6973 | 36    |
| H(6B)  | -915  | 7970  | 7367 | 36    |
| H(7B)  | -72   | 6156  | 8020 | 43    |
| H(7A)  | 239   | 5506  | 7140 | 43    |
| H(8A)  | 896   | 8127  | 7793 | 45    |
| H(8B)  | 1557  | 6769  | 7667 | 45    |
| H(9)   | 1400  | 6933  | 6215 | 36    |
| H(10A) | 2658  | 8348  | 6758 | 71    |
| H(10C) | 1920  | 9629  | 6829 | 71    |
| H(10B) | 2207  | 9024  | 5934 | 71    |

Table 6. Torsion angles [deg] for A.

|                      |             |
|----------------------|-------------|
| C(5)-N(1)-C(1)-O(2)  | 175.02(17)  |
| C(5)-N(1)-C(1)-C(2)  | -5.3(2)     |
| O(2)-C(1)-C(2)-C(3)  | 165.30(17)  |
| N(1)-C(1)-C(2)-C(3)  | -14.38(19)  |
| C(4)-O(1)-C(3)-C(2)  | -79.45(19)  |
| C(4)-O(1)-C(3)-C(5)  | 167.84(15)  |
| C(1)-C(2)-C(3)-O(1)  | -88.80(16)  |
| C(1)-C(2)-C(3)-C(5)  | 26.89(17)   |
| C(9)-O(3)-C(5)-N(1)  | -68.72(17)  |
| C(9)-O(3)-C(5)-C(6)  | 56.84(18)   |
| C(9)-O(3)-C(5)-C(3)  | -177.65(13) |
| C(1)-N(1)-C(5)-O(3)  | -88.06(17)  |
| C(1)-N(1)-C(5)-C(6)  | 147.48(15)  |
| C(1)-N(1)-C(5)-C(3)  | 22.38(18)   |
| O(1)-C(3)-C(5)-O(3)  | -156.38(13) |
| C(2)-C(3)-C(5)-O(3)  | 85.54(15)   |
| O(1)-C(3)-C(5)-N(1)  | 88.72(15)   |
| C(2)-C(3)-C(5)-N(1)  | -29.36(16)  |
| O(1)-C(3)-C(5)-C(6)  | -34.2(2)    |
| C(2)-C(3)-C(5)-C(6)  | -152.28(15) |
| O(3)-C(5)-C(6)-C(7)  | -53.83(19)  |
| N(1)-C(5)-C(6)-C(7)  | 70.37(19)   |
| C(3)-C(5)-C(6)-C(7)  | -172.52(15) |
| C(5)-C(6)-C(7)-C(8)  | 53.4(2)     |
| C(6)-C(7)-C(8)-C(9)  | -54.6(2)    |
| C(5)-O(3)-C(9)-C(10) | 178.34(15)  |
| C(5)-O(3)-C(9)-C(8)  | -58.08(19)  |
| C(7)-C(8)-C(9)-O(3)  | 56.2(2)     |
| C(7)-C(8)-C(9)-C(10) | 175.14(16)  |

Symmetry transformations used to generate equivalent atoms:

Table 7. Hydrogen bonds for A [A and deg.].

| D-H...A            | d(D-H) | d(H...A) | d(D...A)   | <(DHA) |
|--------------------|--------|----------|------------|--------|
| N(1)-H(1)...O(2)#1 | 0.88   | 1.98     | 2.8495(19) | 170.0  |

Symmetry transformations used to generate equivalent atoms:

#1 -x,-y+1,-z+1

### The X-ray structure of compound 4b

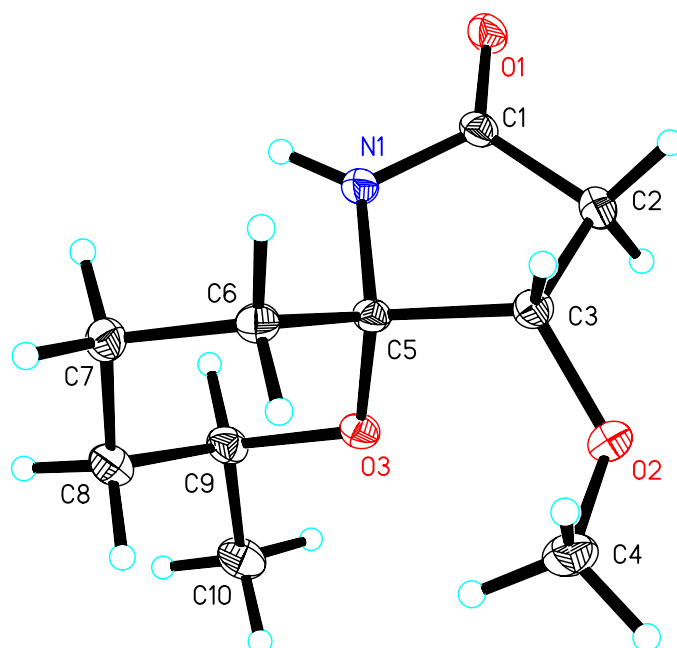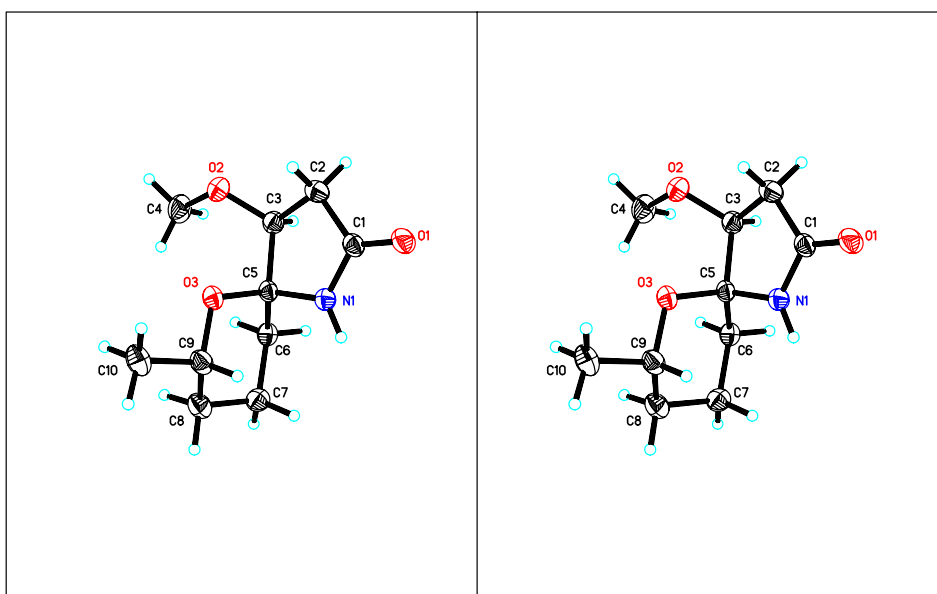

Table 1. Crystal data and structure refinement for A.

|                                   |                                                                                                                       |
|-----------------------------------|-----------------------------------------------------------------------------------------------------------------------|
| Identification code               | a                                                                                                                     |
| Empirical formula                 | C <sub>10</sub> H <sub>17</sub> N O <sub>3</sub>                                                                      |
| Formula weight                    | 199.25                                                                                                                |
| Temperature                       | 173(2) K                                                                                                              |
| Wavelength                        | 0.71073 Å                                                                                                             |
| Crystal system, space group       | Monoclinic, C <sub>2</sub> /c                                                                                         |
| Unit cell dimensions              | a = 25.951(5) Å    alpha = 90 deg.<br>b = 5.6442(11) Å    beta = 113.62(3) deg.<br>c = 15.203(3) Å    gamma = 90 deg. |
| Volume                            | 2040.3(7) Å <sup>3</sup>                                                                                              |
| Z, Calculated density             | 8, 1.297 Mg/m <sup>3</sup>                                                                                            |
| Absorption coefficient            | 0.095 mm <sup>-1</sup>                                                                                                |
| F(000)                            | 864                                                                                                                   |
| Crystal size                      | 0.23 x 0.13 x 0.09 mm                                                                                                 |
| Theta range for data collection   | 2.73 to 27.50 deg.                                                                                                    |
| Limiting indices                  | -26 ≤ h ≤ 33, -7 ≤ k ≤ 7, -19 ≤ l ≤ 19                                                                                |
| Reflections collected / unique    | 7381 / 2343 [R(int) = 0.0595]                                                                                         |
| Completeness to theta = 27.50     | 99.9 %                                                                                                                |
| Absorption correction             | Semi-empirical from equivalents                                                                                       |
| Max. and min. transmission        | 1.0000 and 0.6611                                                                                                     |
| Refinement method                 | Full-matrix least-squares on F <sup>2</sup>                                                                           |
| Data / restraints / parameters    | 2343 / 0 / 129                                                                                                        |
| Goodness-of-fit on F <sup>2</sup> | 1.233                                                                                                                 |
| Final R indices [I > 2σ(I)]       | R1 = 0.0833, wR2 = 0.1619                                                                                             |
| R indices (all data)              | R1 = 0.0947, wR2 = 0.1678                                                                                             |
| Largest diff. peak and hole       | 0.275 and -0.230 e.Å <sup>-3</sup>                                                                                    |

Table 2. Atomic coordinates ( $\times 10^4$ ) and equivalent isotropic displacement parameters ( $\text{Å}^2 \times 10^3$ ) for A.

$U(\text{eq})$  is defined as one third of the trace of the orthogonalized  $U_{ij}$  tensor.

|       | x       | y        | z       | $U(\text{eq})$ |
|-------|---------|----------|---------|----------------|
| O(1)  | 2418(1) | 12839(3) | 1120(1) | 30(1)          |
| O(2)  | 3922(1) | 8093(3)  | 3098(1) | 32(1)          |
| O(3)  | 4009(1) | 9858(3)  | 1531(1) | 24(1)          |
| N(1)  | 3015(1) | 10312(4) | 814(1)  | 24(1)          |
| C(1)  | 2793(1) | 11335(4) | 1382(2) | 24(1)          |
| C(2)  | 3080(1) | 10342(5) | 2375(2) | 28(1)          |
| C(3)  | 3418(1) | 8242(5)  | 2267(2) | 25(1)          |
| C(4)  | 4251(1) | 6044(5)  | 3141(2) | 37(1)          |
| C(5)  | 3483(1) | 8705(4)  | 1302(2) | 21(1)          |
| C(6)  | 3438(1) | 6479(4)  | 708(2)  | 25(1)          |
| C(7)  | 3544(1) | 7007(5)  | -190(2) | 28(1)          |
| C(8)  | 4109(1) | 8284(5)  | 104(2)  | 31(1)          |
| C(9)  | 4124(1) | 10459(5) | 698(2)  | 27(1)          |
| C(10) | 4691(1) | 11685(5) | 1093(2) | 37(1)          |

Table 3. Bond lengths [Å] and angles [deg] for A.

---

|                |            |
|----------------|------------|
| O(1)-C(1)      | 1.232(3)   |
| O(2)-C(3)      | 1.410(3)   |
| O(2)-C(4)      | 1.424(3)   |
| O(3)-C(5)      | 1.424(3)   |
| O(3)-C(9)      | 1.452(3)   |
| N(1)-C(1)      | 1.344(3)   |
| N(1)-C(5)      | 1.458(3)   |
| N(1)-H(1)      | 0.8800     |
| C(1)-C(2)      | 1.498(3)   |
| C(2)-C(3)      | 1.523(3)   |
| C(2)-H(2A)     | 0.9900     |
| C(2)-H(2B)     | 0.9900     |
| C(3)-C(5)      | 1.565(3)   |
| C(3)-H(3)      | 1.0000     |
| C(4)-H(4B)     | 0.9800     |
| C(4)-H(4A)     | 0.9800     |
| C(4)-H(4C)     | 0.9800     |
| C(5)-C(6)      | 1.525(3)   |
| C(6)-C(7)      | 1.526(3)   |
| C(6)-H(6A)     | 0.9900     |
| C(6)-H(6B)     | 0.9900     |
| C(7)-C(8)      | 1.529(4)   |
| C(7)-H(7A)     | 0.9900     |
| C(7)-H(7B)     | 0.9900     |
| C(8)-C(9)      | 1.514(4)   |
| C(8)-H(8A)     | 0.9900     |
| C(8)-H(8B)     | 0.9900     |
| C(9)-C(10)     | 1.516(4)   |
| C(9)-H(9)      | 1.0000     |
| C(10)-H(10B)   | 0.9800     |
| C(10)-H(10C)   | 0.9800     |
| C(10)-H(10A)   | 0.9800     |
|                |            |
| C(3)-O(2)-C(4) | 114.4(2)   |
| C(5)-O(3)-C(9) | 113.92(18) |
| C(1)-N(1)-C(5) | 115.1(2)   |
| C(1)-N(1)-H(1) | 122.4      |
| C(5)-N(1)-H(1) | 122.4      |
| O(1)-C(1)-N(1) | 125.1(2)   |
| O(1)-C(1)-C(2) | 126.3(2)   |

|                  |            |
|------------------|------------|
| N(1)-C(1)-C(2)   | 108.6(2)   |
| C(1)-C(2)-C(3)   | 104.9(2)   |
| C(1)-C(2)-H(2A)  | 110.8      |
| C(3)-C(2)-H(2A)  | 110.8      |
| C(1)-C(2)-H(2B)  | 110.8      |
| C(3)-C(2)-H(2B)  | 110.8      |
| H(2A)-C(2)-H(2B) | 108.8      |
| O(2)-C(3)-C(2)   | 108.5(2)   |
| O(2)-C(3)-C(5)   | 116.17(19) |
| C(2)-C(3)-C(5)   | 104.71(19) |
| O(2)-C(3)-H(3)   | 109.1      |
| C(2)-C(3)-H(3)   | 109.1      |
| C(5)-C(3)-H(3)   | 109.1      |
| O(2)-C(4)-H(4B)  | 109.5      |
| O(2)-C(4)-H(4A)  | 109.5      |
| H(4B)-C(4)-H(4A) | 109.5      |
| O(2)-C(4)-H(4C)  | 109.5      |
| H(4B)-C(4)-H(4C) | 109.5      |
| H(4A)-C(4)-H(4C) | 109.5      |
| O(3)-C(5)-N(1)   | 111.22(19) |
| O(3)-C(5)-C(6)   | 111.09(18) |
| N(1)-C(5)-C(6)   | 111.1(2)   |
| O(3)-C(5)-C(3)   | 107.49(18) |
| N(1)-C(5)-C(3)   | 101.54(18) |
| C(6)-C(5)-C(3)   | 114.0(2)   |
| C(5)-C(6)-C(7)   | 111.7(2)   |
| C(5)-C(6)-H(6A)  | 109.3      |
| C(7)-C(6)-H(6A)  | 109.3      |
| C(5)-C(6)-H(6B)  | 109.3      |
| C(7)-C(6)-H(6B)  | 109.3      |
| H(6A)-C(6)-H(6B) | 107.9      |
| C(6)-C(7)-C(8)   | 109.1(2)   |
| C(6)-C(7)-H(7A)  | 109.9      |
| C(8)-C(7)-H(7A)  | 109.9      |
| C(6)-C(7)-H(7B)  | 109.9      |
| C(8)-C(7)-H(7B)  | 109.9      |
| H(7A)-C(7)-H(7B) | 108.3      |
| C(9)-C(8)-C(7)   | 110.5(2)   |
| C(9)-C(8)-H(8A)  | 109.6      |
| C(7)-C(8)-H(8A)  | 109.6      |
| C(9)-C(8)-H(8B)  | 109.6      |
| C(7)-C(8)-H(8B)  | 109.6      |
| H(8A)-C(8)-H(8B) | 108.1      |
| O(3)-C(9)-C(8)   | 111.4(2)   |



|                     |          |
|---------------------|----------|
| O(3)-C(9)-C(10)     | 105.5(2) |
| C(8)-C(9)-C(10)     | 113.3(2) |
| O(3)-C(9)-H(9)      | 108.8    |
| C(8)-C(9)-H(9)      | 108.8    |
| C(10)-C(9)-H(9)     | 108.8    |
| C(9)-C(10)-H(10B)   | 109.5    |
| C(9)-C(10)-H(10C)   | 109.5    |
| H(10B)-C(10)-H(10C) | 109.5    |
| C(9)-C(10)-H(10A)   | 109.5    |
| H(10B)-C(10)-H(10A) | 109.5    |
| H(10C)-C(10)-H(10A) | 109.5    |

---

Symmetry transformations used to generate equivalent atoms:

Table 4. Anisotropic displacement parameters ( $\text{Å}^2 \times 10^3$ ) for A. The anisotropic displacement factor exponent takes the form:  $-2 \pi^2 [ h^2 a^{*2} U_{11} + \dots + 2 h k a^* b^* U_{12} ]$

|       | U11   | U22   | U33   | U23   | U13   | U12   |
|-------|-------|-------|-------|-------|-------|-------|
| O(1)  | 29(1) | 34(1) | 30(1) | 4(1)  | 15(1) | 11(1) |
| O(2)  | 26(1) | 41(1) | 25(1) | 4(1)  | 6(1)  | 5(1)  |
| O(3)  | 20(1) | 26(1) | 28(1) | -1(1) | 10(1) | -2(1) |
| N(1)  | 22(1) | 27(1) | 23(1) | 2(1)  | 9(1)  | 3(1)  |
| C(1)  | 20(1) | 26(1) | 27(1) | -2(1) | 12(1) | -3(1) |
| C(2)  | 29(1) | 33(1) | 27(1) | 1(1)  | 15(1) | 1(1)  |
| C(3)  | 22(1) | 28(1) | 24(1) | 3(1)  | 9(1)  | -2(1) |
| C(4)  | 30(1) | 40(2) | 37(2) | 11(1) | 9(1)  | 11(1) |
| C(5)  | 17(1) | 24(1) | 23(1) | 1(1)  | 8(1)  | -2(1) |
| C(6)  | 22(1) | 25(1) | 27(1) | 0(1)  | 9(1)  | -1(1) |
| C(7)  | 30(1) | 26(1) | 26(1) | -4(1) | 10(1) | 3(1)  |
| C(8)  | 29(1) | 31(1) | 36(1) | 2(1)  | 18(1) | 4(1)  |
| C(9)  | 25(1) | 29(1) | 31(1) | 5(1)  | 14(1) | 1(1)  |
| C(10) | 28(1) | 39(2) | 47(2) | 1(1)  | 20(1) | -5(1) |

Table 5. Hydrogen coordinates ( $\times 10^4$ ) and isotropic displacement parameters ( $\text{Å}^2 \times 10^3$ ) for A.

|        | x    | y     | z    | U(eq) |
|--------|------|-------|------|-------|
| H(1)   | 2887 | 10593 | 194  | 28    |
| H(2A)  | 2800 | 9823  | 2626 | 34    |
| H(2B)  | 3330 | 11539 | 2817 | 34    |
| H(3)   | 3196 | 6757  | 2205 | 30    |
| H(4B)  | 4433 | 6222  | 2690 | 56    |
| H(4A)  | 4008 | 4642  | 2968 | 56    |
| H(4C)  | 4540 | 5859  | 3794 | 56    |
| H(6A)  | 3057 | 5788  | 516  | 30    |
| H(6B)  | 3715 | 5294  | 1105 | 30    |
| H(7A)  | 3239 | 8014  | -634 | 33    |
| H(7B)  | 3551 | 5510  | -524 | 33    |
| H(8A)  | 4417 | 7197  | 482  | 37    |
| H(8B)  | 4165 | 8760  | -478 | 37    |
| H(9)   | 3833 | 11607 | 290  | 32    |
| H(10B) | 4677 | 13055 | 1478 | 55    |
| H(10C) | 4784 | 12218 | 560  | 55    |
| H(10A) | 4980 | 10576 | 1496 | 55    |

Table 6. Torsion angles [deg] for A.

---

|                      |             |
|----------------------|-------------|
| C(5)-N(1)-C(1)-O(1)  | 175.8(2)    |
| C(5)-N(1)-C(1)-C(2)  | -4.1(3)     |
| O(1)-C(1)-C(2)-C(3)  | 169.2(2)    |
| N(1)-C(1)-C(2)-C(3)  | -11.0(3)    |
| C(4)-O(2)-C(3)-C(2)  | 173.4(2)    |
| C(4)-O(2)-C(3)-C(5)  | -69.1(3)    |
| C(1)-C(2)-C(3)-O(2)  | 145.0(2)    |
| C(1)-C(2)-C(3)-C(5)  | 20.4(2)     |
| C(9)-O(3)-C(5)-N(1)  | -68.3(2)    |
| C(9)-O(3)-C(5)-C(6)  | 56.1(3)     |
| C(9)-O(3)-C(5)-C(3)  | -178.61(19) |
| C(1)-N(1)-C(5)-O(3)  | -97.4(2)    |
| C(1)-N(1)-C(5)-C(6)  | 138.2(2)    |
| C(1)-N(1)-C(5)-C(3)  | 16.7(3)     |
| O(2)-C(3)-C(5)-O(3)  | -24.7(3)    |
| C(2)-C(3)-C(5)-O(3)  | 95.0(2)     |
| O(2)-C(3)-C(5)-N(1)  | -141.5(2)   |
| C(2)-C(3)-C(5)-N(1)  | -21.9(2)    |
| O(2)-C(3)-C(5)-C(6)  | 98.9(2)     |
| C(2)-C(3)-C(5)-C(6)  | -141.5(2)   |
| O(3)-C(5)-C(6)-C(7)  | -54.4(3)    |
| N(1)-C(5)-C(6)-C(7)  | 70.0(2)     |
| C(3)-C(5)-C(6)-C(7)  | -176.05(19) |
| C(5)-C(6)-C(7)-C(8)  | 53.7(3)     |
| C(6)-C(7)-C(8)-C(9)  | -54.2(3)    |
| C(5)-O(3)-C(9)-C(8)  | -57.5(3)    |
| C(5)-O(3)-C(9)-C(10) | 179.1(2)    |
| C(7)-C(8)-C(9)-O(3)  | 55.8(3)     |
| C(7)-C(8)-C(9)-C(10) | 174.6(2)    |

---

Symmetry transformations used to generate equivalent atoms:

Table 7. Hydrogen bonds for A [A and deg.].

| D-H...A            | d(D-H) | d(H...A) | d(D...A) | <(DHA) |
|--------------------|--------|----------|----------|--------|
| N(1)-H(1)...O(1)#1 | 0.88   | 2.03     | 2.889(3) | 164.3  |

Symmetry transformations used to generate equivalent atoms:

#1 -x+1/2,-y+5/2,-z

### The X-ray structure of compound 3b

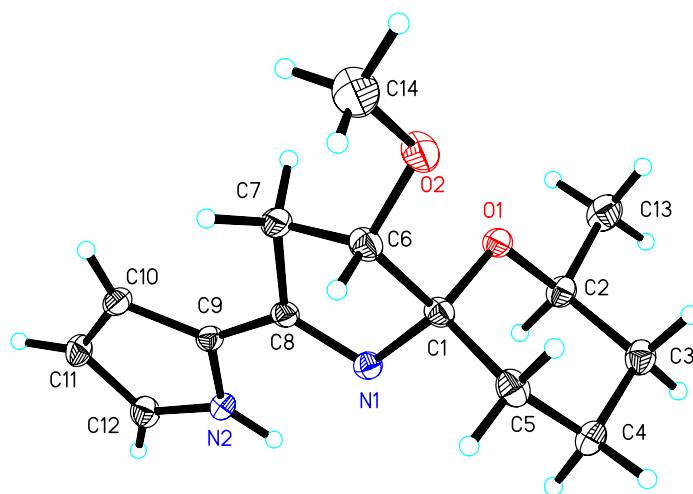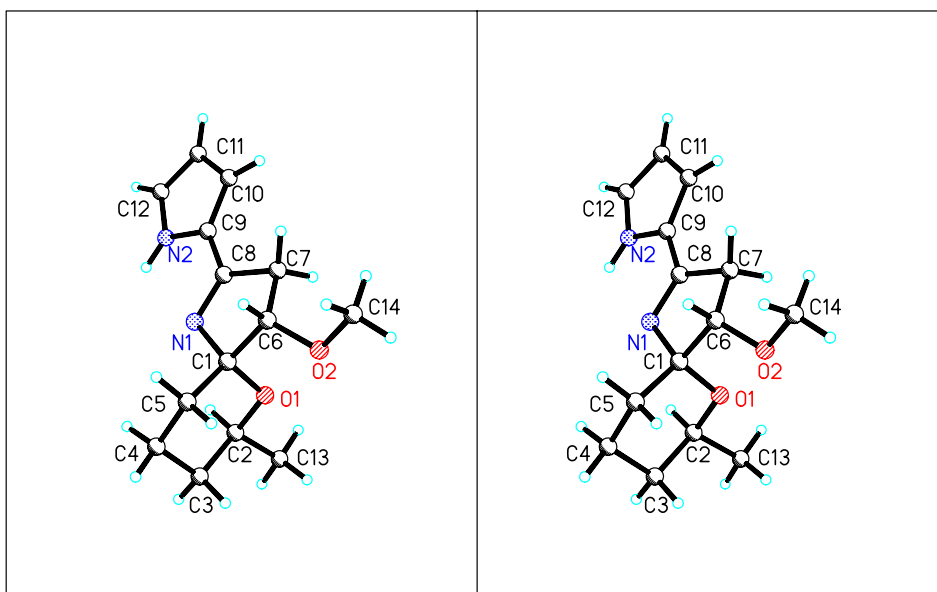

Table 1. Crystal data and structure refinement for A.

|                                   |                                                               |
|-----------------------------------|---------------------------------------------------------------|
| Identification code               | a                                                             |
| Empirical formula                 | C <sub>14</sub> H <sub>20</sub> N <sub>2</sub> O <sub>2</sub> |
| Formula weight                    | 248.32                                                        |
| Temperature                       | 173(2) K                                                      |
| Wavelength                        | 0.71073 Å                                                     |
| Crystal system, space group       | Orthorhombic, Pbcn                                            |
| Unit cell dimensions              | a = 15.663(3) Å    alpha = 90 deg.                            |
| b = 8.2891(17) Å                  | beta = 90 deg.                                                |
| c = 21.056(4) Å                   | gamma = 90 deg.                                               |
| Volume                            | 2733.7(10) Å <sup>3</sup>                                     |
| Z, Calculated density             | 8, 1.207 Mg/m <sup>3</sup>                                    |
| Absorption coefficient            | 0.081 mm <sup>-1</sup>                                        |
| F(000)                            | 1072                                                          |
| Crystal size                      | 0.20 x 0.20 x 0.17 mm                                         |
| Theta range for data collection   | 1.93 to 24.99 deg.                                            |
| Limiting indices                  | -18 ≤ h ≤ 18, -8 ≤ k ≤ 9, -25 ≤ l ≤ 16                        |
| Reflections collected / unique    | 9483 / 2396 [R(int) = 0.0665]                                 |
| Completeness to theta = 24.99     | 99.9 %                                                        |
| Absorption correction             | Semi-empirical from equivalents                               |
| Max. and min. transmission        | 0.9863 and 0.9839                                             |
| Refinement method                 | Full-matrix least-squares on F <sup>2</sup>                   |
| Data / restraints / parameters    | 2396 / 0 / 165                                                |
| Goodness-of-fit on F <sup>2</sup> | 1.245                                                         |
| Final R indices [I > 2σ(I)]       | R1 = 0.0731, wR2 = 0.1230                                     |
| R indices (all data)              | R1 = 0.0889, wR2 = 0.1285                                     |
| Largest diff. peak and hole       | 0.186 and -0.196 e.Å <sup>-3</sup>                            |

Table 2. Atomic coordinates ( $\times 10^4$ ) and equivalent isotropic displacement parameters ( $\text{\AA}^2 \times 10^3$ ) for A.  
U(eq) is defined as one third of the trace of the orthogonalized  $U_{ij}$  tensor.

|       | x       | y        | z       | U(eq) |
|-------|---------|----------|---------|-------|
| O(1)  | 5964(1) | 4975(2)  | 3735(1) | 28(1) |
| O(2)  | 6924(1) | 6293(2)  | 4634(1) | 43(1) |
| N(1)  | 5662(1) | 7524(2)  | 3282(1) | 24(1) |
| N(2)  | 5990(1) | 9061(2)  | 2076(1) | 27(1) |
| C(1)  | 5751(2) | 6610(3)  | 3884(1) | 26(1) |
| C(2)  | 5294(2) | 4103(3)  | 3415(1) | 29(1) |
| C(3)  | 4500(2) | 4032(3)  | 3827(1) | 33(1) |
| C(4)  | 4215(2) | 5722(3)  | 4013(1) | 35(1) |
| C(5)  | 4952(2) | 6674(3)  | 4289(1) | 33(1) |
| C(6)  | 6540(2) | 7360(3)  | 4198(1) | 31(1) |
| C(7)  | 7084(2) | 7870(3)  | 3637(1) | 32(1) |
| C(8)  | 6404(2) | 8129(3)  | 3144(1) | 24(1) |
| C(9)  | 6571(2) | 8975(3)  | 2562(1) | 25(1) |
| C(10) | 7280(2) | 9849(3)  | 2378(1) | 31(1) |
| C(11) | 7116(2) | 10485(3) | 1773(1) | 35(1) |
| C(12) | 6317(2) | 9964(3)  | 1601(1) | 33(1) |
| C(13) | 5653(2) | 2459(3)  | 3261(2) | 42(1) |
| C(14) | 7541(2) | 7080(4)  | 5018(2) | 61(1) |



Table 3. Bond lengths [Å] and angles [deg] for A.

---

|              |          |
|--------------|----------|
| O(1)-C(1)    | 1.431(3) |
| O(1)-C(2)    | 1.442(3) |
| O(2)-C(6)    | 1.410(3) |
| O(2)-C(14)   | 1.419(3) |
| N(1)-C(8)    | 1.298(3) |
| N(1)-C(1)    | 1.483(3) |
| N(2)-C(12)   | 1.349(3) |
| N(2)-C(9)    | 1.371(3) |
| N(2)-H(2)    | 0.8800   |
| C(1)-C(5)    | 1.516(4) |
| C(1)-C(6)    | 1.534(3) |
| C(2)-C(13)   | 1.510(4) |
| C(2)-C(3)    | 1.515(4) |
| C(2)-H(2A)   | 1.0000   |
| C(3)-C(4)    | 1.522(4) |
| C(3)-H(3B)   | 0.9900   |
| C(3)-H(3A)   | 0.9900   |
| C(4)-C(5)    | 1.515(4) |
| C(4)-H(4A)   | 0.9900   |
| C(4)-H(4B)   | 0.9900   |
| C(5)-H(5B)   | 0.9900   |
| C(5)-H(5A)   | 0.9900   |
| C(6)-C(7)    | 1.516(4) |
| C(6)-H(6)    | 1.0000   |
| C(7)-C(8)    | 1.504(3) |
| C(7)-H(7B)   | 0.9900   |
| C(7)-H(7A)   | 0.9900   |
| C(8)-C(9)    | 1.436(4) |
| C(9)-C(10)   | 1.381(3) |
| C(10)-C(11)  | 1.403(4) |
| C(10)-H(10)  | 0.9500   |
| C(11)-C(12)  | 1.372(4) |
| C(11)-H(11)  | 0.9500   |
| C(12)-H(12)  | 0.9500   |
| C(13)-H(13C) | 0.9800   |
| C(13)-H(13B) | 0.9800   |
| C(13)-H(13A) | 0.9800   |
| C(14)-H(14C) | 0.9800   |
| C(14)-H(14A) | 0.9800   |
| C(14)-H(14B) | 0.9800   |

|                  |            |
|------------------|------------|
| C(1)-O(1)-C(2)   | 114.02(18) |
| C(6)-O(2)-C(14)  | 111.9(2)   |
| C(8)-N(1)-C(1)   | 107.8(2)   |
| C(12)-N(2)-C(9)  | 109.2(2)   |
| C(12)-N(2)-H(2)  | 125.4      |
| C(9)-N(2)-H(2)   | 125.4      |
| O(1)-C(1)-N(1)   | 108.6(2)   |
| O(1)-C(1)-C(5)   | 110.5(2)   |
| N(1)-C(1)-C(5)   | 112.7(2)   |
| O(1)-C(1)-C(6)   | 106.8(2)   |
| N(1)-C(1)-C(6)   | 103.7(2)   |
| C(5)-C(1)-C(6)   | 114.1(2)   |
| O(1)-C(2)-C(13)  | 106.3(2)   |
| O(1)-C(2)-C(3)   | 110.5(2)   |
| C(13)-C(2)-C(3)  | 113.2(2)   |
| O(1)-C(2)-H(2A)  | 108.9      |
| C(13)-C(2)-H(2A) | 108.9      |
| C(3)-C(2)-H(2A)  | 108.9      |
| C(2)-C(3)-C(4)   | 110.6(2)   |
| C(2)-C(3)-H(3B)  | 109.5      |
| C(4)-C(3)-H(3B)  | 109.5      |
| C(2)-C(3)-H(3A)  | 109.5      |
| C(4)-C(3)-H(3A)  | 109.5      |
| H(3B)-C(3)-H(3A) | 108.1      |
| C(5)-C(4)-C(3)   | 110.8(2)   |
| C(5)-C(4)-H(4A)  | 109.5      |
| C(3)-C(4)-H(4A)  | 109.5      |
| C(5)-C(4)-H(4B)  | 109.5      |
| C(3)-C(4)-H(4B)  | 109.5      |
| H(4A)-C(4)-H(4B) | 108.1      |
| C(4)-C(5)-C(1)   | 113.2(2)   |
| C(4)-C(5)-H(5B)  | 108.9      |
| C(1)-C(5)-H(5B)  | 108.9      |
| C(4)-C(5)-H(5A)  | 108.9      |
| C(1)-C(5)-H(5A)  | 108.9      |
| H(5B)-C(5)-H(5A) | 107.7      |
| O(2)-C(6)-C(7)   | 116.3(2)   |
| O(2)-C(6)-C(1)   | 111.7(2)   |
| C(7)-C(6)-C(1)   | 103.3(2)   |
| O(2)-C(6)-H(6)   | 108.4      |
| C(7)-C(6)-H(6)   | 108.4      |
| C(1)-C(6)-H(6)   | 108.4      |
| C(8)-C(7)-C(6)   | 100.4(2)   |
| C(8)-C(7)-H(7B)  | 111.7      |

|                     |          |
|---------------------|----------|
| C(6)-C(7)-H(7B)     | 111.7    |
| C(8)-C(7)-H(7A)     | 111.7    |
| C(6)-C(7)-H(7A)     | 111.7    |
| H(7B)-C(7)-H(7A)    | 109.5    |
| N(1)-C(8)-C(9)      | 122.9(2) |
| N(1)-C(8)-C(7)      | 115.1(2) |
| C(9)-C(8)-C(7)      | 122.0(2) |
| N(2)-C(9)-C(10)     | 107.3(2) |
| N(2)-C(9)-C(8)      | 122.8(2) |
| C(10)-C(9)-C(8)     | 129.9(2) |
| C(9)-C(10)-C(11)    | 107.7(2) |
| C(9)-C(10)-H(10)    | 126.1    |
| C(11)-C(10)-H(10)   | 126.1    |
| C(12)-C(11)-C(10)   | 106.7(2) |
| C(12)-C(11)-H(11)   | 126.6    |
| C(10)-C(11)-H(11)   | 126.6    |
| N(2)-C(12)-C(11)    | 109.0(3) |
| N(2)-C(12)-H(12)    | 125.5    |
| C(11)-C(12)-H(12)   | 125.5    |
| C(2)-C(13)-H(13C)   | 109.5    |
| C(2)-C(13)-H(13B)   | 109.5    |
| H(13C)-C(13)-H(13B) | 109.5    |
| C(2)-C(13)-H(13A)   | 109.5    |
| H(13C)-C(13)-H(13A) | 109.5    |
| H(13B)-C(13)-H(13A) | 109.5    |
| O(2)-C(14)-H(14C)   | 109.5    |
| O(2)-C(14)-H(14A)   | 109.5    |
| H(14C)-C(14)-H(14A) | 109.5    |
| O(2)-C(14)-H(14B)   | 109.5    |
| H(14C)-C(14)-H(14B) | 109.5    |
| H(14A)-C(14)-H(14B) | 109.5    |

---

Symmetry transformations used to generate equivalent atoms:

Table 4. Anisotropic displacement parameters ( $\text{\AA}^2 \times 10^3$ ) for A.

The anisotropic displacement factor exponent takes the form:

$$-2 \pi^2 [ h^2 a^{*2} U_{11} + \dots + 2 h k a^* b^* U_{12} ]$$

|       | U11   | U22   | U33   | U23    | U13    | U12    |
|-------|-------|-------|-------|--------|--------|--------|
| O(1)  | 25(1) | 24(1) | 33(1) | -2(1)  | -6(1)  | -2(1)  |
| O(2)  | 49(1) | 38(1) | 41(1) | 8(1)   | -25(1) | -11(1) |
| N(1)  | 23(1) | 24(1) | 25(1) | -2(1)  | -1(1)  | 1(1)   |
| N(2)  | 22(1) | 28(1) | 31(1) | 2(1)   | 2(1)   | -2(1)  |
| C(1)  | 28(1) | 23(1) | 25(2) | 0(1)   | -5(1)  | 0(1)   |
| C(2)  | 27(1) | 31(1) | 29(2) | -4(1)  | -5(1)  | -5(1)  |
| C(3)  | 33(2) | 34(2) | 32(2) | 1(1)   | -3(1)  | -7(1)  |
| C(4)  | 28(2) | 39(2) | 38(2) | 5(1)   | 9(1)   | -2(1)  |
| C(5)  | 43(2) | 29(1) | 27(2) | 1(1)   | 2(1)   | 1(1)   |
| C(6)  | 35(2) | 27(1) | 30(2) | 1(1)   | -8(1)  | -1(1)  |
| C(7)  | 26(1) | 26(1) | 43(2) | -2(1)  | -9(1)  | -2(1)  |
| C(8)  | 23(1) | 19(1) | 30(2) | -4(1)  | -3(1)  | 2(1)   |
| C(9)  | 21(1) | 23(1) | 31(2) | -3(1)  | 0(1)   | 1(1)   |
| C(10) | 21(1) | 30(1) | 42(2) | -5(1)  | 0(1)   | -1(1)  |
| C(11) | 30(2) | 34(2) | 41(2) | 5(1)   | 10(1)  | -4(1)  |
| C(12) | 36(2) | 35(2) | 28(2) | 5(1)   | 5(1)   | -1(1)  |
| C(13) | 38(2) | 36(2) | 54(2) | -14(2) | 1(2)   | -6(1)  |
| C(14) | 68(2) | 58(2) | 57(2) | 8(2)   | -37(2) | -18(2) |

Table 5. Hydrogen coordinates (  $\times 10^4$ ) and isotropic

displacement parameters ( $\text{Å}^2 \times 10^3$ ) for A.

|        | x    | y     | z    | U(eq) |
|--------|------|-------|------|-------|
| H(2)   | 5484 | 8601  | 2074 | 32    |
| H(2A)  | 5152 | 4671  | 3010 | 35    |
| H(3B)  | 4622 | 3396  | 4214 | 39    |
| H(3A)  | 4036 | 3485  | 3591 | 39    |
| H(4A)  | 3990 | 6288  | 3634 | 42    |
| H(4B)  | 3749 | 5649  | 4329 | 42    |
| H(5B)  | 5086 | 6246  | 4717 | 39    |
| H(5A)  | 4774 | 7814  | 4339 | 39    |
| H(6)   | 6358 | 8351  | 4432 | 37    |
| H(7B)  | 7403 | 8876  | 3727 | 38    |
| H(7A)  | 7489 | 7012  | 3510 | 38    |
| H(10)  | 7787 | 9995  | 2618 | 37    |
| H(11)  | 7486 | 11148 | 1529 | 42    |
| H(12)  | 6038 | 10201 | 1212 | 39    |
| H(13C) | 5835 | 1926  | 3654 | 63    |
| H(13B) | 6144 | 2578  | 2976 | 63    |
| H(13A) | 5213 | 1805  | 3052 | 63    |
| H(14C) | 7785 | 6306  | 5319 | 91    |
| H(14A) | 7269 | 7963  | 5252 | 91    |
| H(14B) | 7996 | 7514  | 4747 | 91    |

Table 6. Torsion angles [deg] for A.

---

|                        |           |
|------------------------|-----------|
| C(2)-O(1)-C(1)-N(1)    | -66.9(2)  |
| C(2)-O(1)-C(1)-C(5)    | 57.2(3)   |
| C(2)-O(1)-C(1)-C(6)    | -178.1(2) |
| C(8)-N(1)-C(1)-O(1)    | -90.7(2)  |
| C(8)-N(1)-C(1)-C(5)    | 146.6(2)  |
| C(8)-N(1)-C(1)-C(6)    | 22.7(3)   |
| C(1)-O(1)-C(2)-C(13)   | 176.4(2)  |
| C(1)-O(1)-C(2)-C(3)    | -60.4(3)  |
| O(1)-C(2)-C(3)-C(4)    | 55.9(3)   |
| C(13)-C(2)-C(3)-C(4)   | 175.1(2)  |
| C(2)-C(3)-C(4)-C(5)    | -51.0(3)  |
| C(3)-C(4)-C(5)-C(1)    | 49.4(3)   |
| O(1)-C(1)-C(5)-C(4)    | -51.3(3)  |
| N(1)-C(1)-C(5)-C(4)    | 70.3(3)   |
| C(6)-C(1)-C(5)-C(4)    | -171.7(2) |
| C(14)-O(2)-C(6)-C(7)   | 73.7(3)   |
| C(14)-O(2)-C(6)-C(1)   | -168.0(3) |
| O(1)-C(1)-C(6)-O(2)    | -42.2(3)  |
| N(1)-C(1)-C(6)-O(2)    | -156.8(2) |
| C(5)-C(1)-C(6)-O(2)    | 80.2(3)   |
| O(1)-C(1)-C(6)-C(7)    | 83.6(2)   |
| N(1)-C(1)-C(6)-C(7)    | -31.0(2)  |
| C(5)-C(1)-C(6)-C(7)    | -154.0(2) |
| O(2)-C(6)-C(7)-C(8)    | 149.8(2)  |
| C(1)-C(6)-C(7)-C(8)    | 27.0(2)   |
| C(1)-N(1)-C(8)-C(9)    | 174.5(2)  |
| C(1)-N(1)-C(8)-C(7)    | -5.1(3)   |
| C(6)-C(7)-C(8)-N(1)    | -14.8(3)  |
| C(6)-C(7)-C(8)-C(9)    | 165.6(2)  |
| C(12)-N(2)-C(9)-C(10)  | -0.2(3)   |
| C(12)-N(2)-C(9)-C(8)   | 178.5(2)  |
| N(1)-C(8)-C(9)-N(2)    | -7.3(4)   |
| C(7)-C(8)-C(9)-N(2)    | 172.3(2)  |
| N(1)-C(8)-C(9)-C(10)   | 171.1(3)  |
| C(7)-C(8)-C(9)-C(10)   | -9.4(4)   |
| N(2)-C(9)-C(10)-C(11)  | 0.6(3)    |
| C(8)-C(9)-C(10)-C(11)  | -178.0(2) |
| C(9)-C(10)-C(11)-C(12) | -0.7(3)   |
| C(9)-N(2)-C(12)-C(11)  | -0.2(3)   |
| C(10)-C(11)-C(12)-N(2) | 0.6(3)    |

---

Symmetry transformations used to generate equivalent atoms:

Table 7. Hydrogen bonds for A [A and deg.].

| D-H...A          | d(D-H) | d(H...A) | d(D...A) | <(DHA) |
|------------------|--------|----------|----------|--------|
| N(2)-H(2)...N(1) | 0.88   | 2.71     | 2.887(3) | 92.6   |

Symmetry transformations used to generate equivalent atoms:

### The X-ray structure of compound 4c

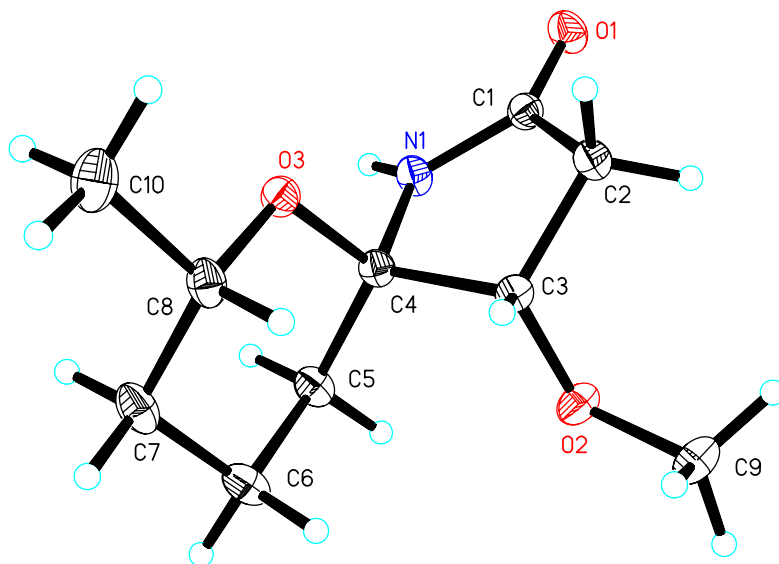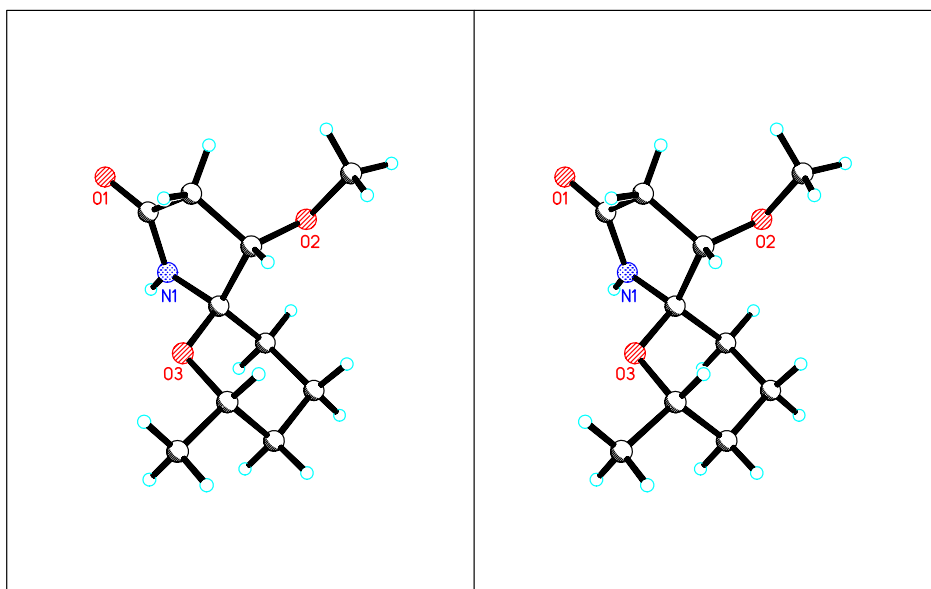



Table 1. Crystal data and structure refinement for sa1523.

|                                   |                                                                                                                       |
|-----------------------------------|-----------------------------------------------------------------------------------------------------------------------|
| Identification code               | sa1523                                                                                                                |
| Empirical formula                 | C <sub>10</sub> H <sub>17</sub> N O <sub>3</sub>                                                                      |
| Formula weight                    | 199.25                                                                                                                |
| Temperature                       | 173(2) K                                                                                                              |
| Wavelength                        | 0.71073 Å                                                                                                             |
| Crystal system, space group       | Monoclinic, P2(1)/n                                                                                                   |
| Unit cell dimensions              | a = 11.044(3) Å    alpha = 90 deg.<br>b = 8.0060(19) Å    beta = 98.346(4) deg.<br>c = 11.730(3) Å    gamma = 90 deg. |
| Volume                            | 1026.1(4) Å <sup>3</sup>                                                                                              |
| Z, Calculated density             | 4, 1.290 Mg/m <sup>3</sup>                                                                                            |
| Absorption coefficient            | 0.095 mm <sup>-1</sup>                                                                                                |
| F(000)                            | 432                                                                                                                   |
| Crystal size                      | 0.39 x 0.34 x 0.28 mm                                                                                                 |
| Theta range for data collection   | 3.09 to 27.48 deg.                                                                                                    |
| Limiting indices                  | -14 ≤ h ≤ 12,    -8 ≤ k ≤ 10,    -15 ≤ l ≤ 15                                                                         |
| Reflections collected / unique    | 5182 / 2344 [R(int) = 0.0296]                                                                                         |
| Completeness to theta = 27.48     | 99.4 %                                                                                                                |
| Absorption correction             | Semi-empirical from equivalents                                                                                       |
| Max. and min. transmission        | 0.9740 and 0.9640                                                                                                     |
| Refinement method                 | Full-matrix least-squares on F <sup>2</sup>                                                                           |
| Data / restraints / parameters    | 2344 / 0 / 129                                                                                                        |
| Goodness-of-fit on F <sup>2</sup> | 1.112                                                                                                                 |
| Final R indices [I > 2σ(I)]       | R1 = 0.0502, wR2 = 0.1136                                                                                             |
| R indices (all data)              | R1 = 0.0555, wR2 = 0.1176                                                                                             |
| Largest diff. peak and hole       | 0.249 and -0.189 e.Å <sup>-3</sup>                                                                                    |

Table 2. Atomic coordinates ( $\times 10^4$ ) and equivalent isotropic displacement parameters ( $\text{\AA}^2 \times 10^3$ ) for sa1523.  
U(eq) is defined as one third of the trace of the orthogonalized Uij tensor.

|       | x       | y        | z       | U(eq) |
|-------|---------|----------|---------|-------|
| O(1)  | 9739(1) | 4798(2)  | 3373(1) | 33(1) |
| O(2)  | 6005(1) | 4087(1)  | 3455(1) | 30(1) |
| O(3)  | 8050(1) | 1059(1)  | 5028(1) | 26(1) |
| N(1)  | 8617(1) | 3761(2)  | 4711(1) | 26(1) |
| C(1)  | 8868(1) | 3997(2)  | 3636(1) | 25(1) |
| C(2)  | 7891(1) | 3125(2)  | 2810(1) | 26(1) |
| C(3)  | 6874(1) | 2767(2)  | 3538(1) | 23(1) |
| C(4)  | 7569(1) | 2718(2)  | 4789(1) | 23(1) |
| C(5)  | 6865(1) | 3323(2)  | 5732(1) | 28(1) |
| C(6)  | 5900(2) | 2062(2)  | 5967(1) | 33(1) |
| C(7)  | 6496(2) | 376(2)   | 6236(1) | 33(1) |
| C(8)  | 7164(1) | -181(2)  | 5259(1) | 28(1) |
| C(9)  | 5138(2) | 3990(2)  | 2431(2) | 37(1) |
| C(10) | 7855(2) | -1806(2) | 5493(2) | 40(1) |

Table 3. Bond lengths [Å] and angles [deg] for sa1523.

---

|                 |            |
|-----------------|------------|
| O(1)-C(1)       | 1.2318(17) |
| O(2)-C(3)       | 1.4209(17) |
| O(2)-C(9)       | 1.4248(18) |
| O(3)-C(4)       | 1.4431(18) |
| O(3)-C(8)       | 1.4464(17) |
| N(1)-C(1)       | 1.3435(18) |
| N(1)-C(4)       | 1.4410(18) |
| N(1)-H(1)       | 0.8800     |
| C(1)-C(2)       | 1.512(2)   |
| C(2)-C(3)       | 1.5328(19) |
| C(2)-H(2B)      | 0.9900     |
| C(2)-H(2A)      | 0.9900     |
| C(3)-C(4)       | 1.5553(19) |
| C(3)-H(3)       | 1.0000     |
| C(4)-C(5)       | 1.520(2)   |
| C(5)-C(6)       | 1.523(2)   |
| C(5)-H(5A)      | 0.9900     |
| C(5)-H(5B)      | 0.9900     |
| C(6)-C(7)       | 1.515(2)   |
| C(6)-H(6B)      | 0.9900     |
| C(6)-H(6A)      | 0.9900     |
| C(7)-C(8)       | 1.518(2)   |
| C(7)-H(7A)      | 0.9900     |
| C(7)-H(7B)      | 0.9900     |
| C(8)-C(10)      | 1.513(2)   |
| C(8)-H(8)       | 1.0000     |
| C(9)-H(9C)      | 0.9800     |
| C(9)-H(9B)      | 0.9800     |
| C(9)-H(9A)      | 0.9800     |
| C(10)-H(10C)    | 0.9800     |
| C(10)-H(10B)    | 0.9800     |
| C(10)-H(10A)    | 0.9800     |
| C(3)-O(2)-C(9)  | 112.43(11) |
| C(4)-O(3)-C(8)  | 115.32(11) |
| C(1)-N(1)-C(4)  | 114.73(12) |
| C(1)-N(1)-H(1)  | 122.6      |
| C(4)-N(1)-H(1)  | 122.6      |
| O(1)-C(1)-N(1)  | 125.71(13) |
| O(1)-C(1)-C(2)  | 126.16(13) |
| N(1)-C(1)-C(2)  | 108.12(12) |
| C(1)-C(2)-C(3)  | 104.00(11) |
| C(1)-C(2)-H(2B) | 111.0      |

|                  |            |
|------------------|------------|
| C(3)-C(2)-H(2B)  | 111.0      |
| C(1)-C(2)-H(2A)  | 111.0      |
| C(3)-C(2)-H(2A)  | 111.0      |
| H(2B)-C(2)-H(2A) | 109.0      |
| O(2)-C(3)-C(2)   | 111.39(12) |
| O(2)-C(3)-C(4)   | 108.61(11) |
| C(2)-C(3)-C(4)   | 103.26(11) |
| O(2)-C(3)-H(3)   | 111.1      |
| C(2)-C(3)-H(3)   | 111.1      |
| C(4)-C(3)-H(3)   | 111.1      |
| N(1)-C(4)-O(3)   | 105.60(11) |
| N(1)-C(4)-C(5)   | 111.18(12) |
| O(3)-C(4)-C(5)   | 111.43(12) |
| N(1)-C(4)-C(3)   | 102.48(11) |
| O(3)-C(4)-C(3)   | 108.90(11) |
| C(5)-C(4)-C(3)   | 116.39(12) |
| C(4)-C(5)-C(6)   | 111.46(12) |
| C(4)-C(5)-H(5A)  | 109.3      |
| C(6)-C(5)-H(5A)  | 109.3      |
| C(4)-C(5)-H(5B)  | 109.3      |
| C(6)-C(5)-H(5B)  | 109.3      |
| H(5A)-C(5)-H(5B) | 108.0      |
| C(7)-C(6)-C(5)   | 109.51(13) |
| C(7)-C(6)-H(6B)  | 109.8      |
| C(5)-C(6)-H(6B)  | 109.8      |
| C(7)-C(6)-H(6A)  | 109.8      |
| C(5)-C(6)-H(6A)  | 109.8      |
| H(6B)-C(6)-H(6A) | 108.2      |
| C(6)-C(7)-C(8)   | 110.42(13) |
| C(6)-C(7)-H(7A)  | 109.6      |
| C(8)-C(7)-H(7A)  | 109.6      |
| C(6)-C(7)-H(7B)  | 109.6      |
| C(8)-C(7)-H(7B)  | 109.6      |
| H(7A)-C(7)-H(7B) | 108.1      |
| O(3)-C(8)-C(10)  | 106.68(13) |
| O(3)-C(8)-C(7)   | 110.88(12) |
| C(10)-C(8)-C(7)  | 113.79(14) |
| O(3)-C(8)-H(8)   | 108.4      |
| C(10)-C(8)-H(8)  | 108.4      |
| C(7)-C(8)-H(8)   | 108.4      |
| O(2)-C(9)-H(9C)  | 109.5      |
| O(2)-C(9)-H(9B)  | 109.5      |
| H(9C)-C(9)-H(9B) | 109.5      |
| O(2)-C(9)-H(9A)  | 109.5      |

|                     |       |
|---------------------|-------|
| H(9C)-C(9)-H(9A)    | 109.5 |
| H(9B)-C(9)-H(9A)    | 109.5 |
| C(8)-C(10)-H(10C)   | 109.5 |
| C(8)-C(10)-H(10B)   | 109.5 |
| H(10C)-C(10)-H(10B) | 109.5 |
| C(8)-C(10)-H(10A)   | 109.5 |
| H(10C)-C(10)-H(10A) | 109.5 |
| H(10B)-C(10)-H(10A) | 109.5 |

---

Symmetry transformations used to generate equivalent atoms:

Table 4. Anisotropic displacement parameters ( $\text{\AA}^2 \times 10^3$ ) for sa1523.

The anisotropic displacement factor exponent takes the form:

$$-2 \pi^2 [ h^2 a^{*2} U_{11} + \dots + 2 h k a^* b^* U_{12} ]$$

|       | U11   | U22   | U33   | U23   | U13   | U12    |
|-------|-------|-------|-------|-------|-------|--------|
| O(1)  | 30(1) | 39(1) | 31(1) | 4(1)  | 7(1)  | -11(1) |
| O(2)  | 29(1) | 30(1) | 31(1) | -3(1) | -2(1) | 7(1)   |
| O(3)  | 24(1) | 24(1) | 29(1) | 3(1)  | 3(1)  | -3(1)  |
| N(1)  | 25(1) | 28(1) | 23(1) | 0(1)  | 1(1)  | -10(1) |
| C(1)  | 24(1) | 24(1) | 26(1) | 3(1)  | 4(1)  | -1(1)  |
| C(2)  | 28(1) | 29(1) | 23(1) | 0(1)  | 5(1)  | -3(1)  |
| C(3)  | 22(1) | 21(1) | 24(1) | -2(1) | 2(1)  | -1(1)  |
| C(4)  | 23(1) | 22(1) | 23(1) | 0(1)  | 3(1)  | -4(1)  |
| C(5)  | 30(1) | 29(1) | 24(1) | -5(1) | 6(1)  | -6(1)  |
| C(6)  | 32(1) | 39(1) | 30(1) | -6(1) | 12(1) | -10(1) |
| C(7)  | 39(1) | 35(1) | 28(1) | 1(1)  | 8(1)  | -15(1) |
| C(8)  | 33(1) | 24(1) | 25(1) | 2(1)  | 2(1)  | -8(1)  |
| C(9)  | 31(1) | 36(1) | 39(1) | 0(1)  | -6(1) | 7(1)   |
| C(10) | 52(1) | 26(1) | 40(1) | 5(1)  | 0(1)  | -3(1)  |

Table 5. Hydrogen coordinates ( $\times 10^4$ ) and isotropic displacement parameters ( $\text{Å}^2 \times 10^3$ ) for sa1523.

|        | x    | y     | z    | U(eq) |
|--------|------|-------|------|-------|
| H(1)   | 9057 | 4208  | 5320 | 31    |
| H(2B)  | 8208 | 2075  | 2519 | 32    |
| H(2A)  | 7590 | 3854  | 2148 | 32    |
| H(3)   | 6467 | 1674  | 3320 | 27    |
| H(5A)  | 6464 | 4401  | 5497 | 33    |
| H(5B)  | 7444 | 3514  | 6447 | 33    |
| H(6B)  | 5504 | 2442  | 6627 | 39    |
| H(6A)  | 5261 | 1970  | 5284 | 39    |
| H(7A)  | 5862 | -458  | 6350 | 40    |
| H(7B)  | 7081 | 449   | 6958 | 40    |
| H(8)   | 6551 | -322  | 4549 | 33    |
| H(9C)  | 5544 | 4247  | 1763 | 55    |
| H(9B)  | 4479 | 4796  | 2475 | 55    |
| H(9A)  | 4795 | 2860  | 2352 | 55    |
| H(10C) | 8433 | -1706 | 6207 | 60    |
| H(10B) | 8305 | -2054 | 4851 | 60    |
| H(10A) | 7275 | -2711 | 5571 | 60    |

Table 6. Torsion angles [deg] for sa1523.

---

|                      |             |
|----------------------|-------------|
| C(4)-N(1)-C(1)-O(1)  | -177.67(14) |
| C(4)-N(1)-C(1)-C(2)  | 2.90(17)    |
| O(1)-C(1)-C(2)-C(3)  | -164.74(15) |
| N(1)-C(1)-C(2)-C(3)  | 14.70(15)   |
| C(9)-O(2)-C(3)-C(2)  | 80.59(15)   |
| C(9)-O(2)-C(3)-C(4)  | -166.34(12) |
| C(1)-C(2)-C(3)-O(2)  | 91.53(13)   |
| C(1)-C(2)-C(3)-C(4)  | -24.86(14)  |
| C(1)-N(1)-C(4)-O(3)  | 95.15(14)   |
| C(1)-N(1)-C(4)-C(5)  | -143.85(13) |
| C(1)-N(1)-C(4)-C(3)  | -18.82(16)  |
| C(8)-O(3)-C(4)-N(1)  | 174.00(10)  |
| C(8)-O(3)-C(4)-C(5)  | 53.16(15)   |
| C(8)-O(3)-C(4)-C(3)  | -76.57(14)  |
| O(2)-C(3)-C(4)-N(1)  | -92.24(13)  |
| C(2)-C(3)-C(4)-N(1)  | 26.10(14)   |
| O(2)-C(3)-C(4)-O(3)  | 156.24(11)  |
| C(2)-C(3)-C(4)-O(3)  | -85.42(13)  |
| O(2)-C(3)-C(4)-C(5)  | 29.29(16)   |
| C(2)-C(3)-C(4)-C(5)  | 147.63(13)  |
| N(1)-C(4)-C(5)-C(6)  | -169.72(12) |
| O(3)-C(4)-C(5)-C(6)  | -52.21(16)  |
| C(3)-C(4)-C(5)-C(6)  | 73.47(17)   |
| C(4)-C(5)-C(6)-C(7)  | 54.65(16)   |
| C(5)-C(6)-C(7)-C(8)  | -56.36(16)  |
| C(4)-O(3)-C(8)-C(10) | -179.58(12) |
| C(4)-O(3)-C(8)-C(7)  | -55.17(16)  |
| C(6)-C(7)-C(8)-O(3)  | 56.00(16)   |
| C(6)-C(7)-C(8)-C(10) | 176.25(13)  |

---

Symmetry transformations used to generate equivalent atoms:



Table 7. Hydrogen bonds for sa1523 [Å and deg.].

| D-H...A            | d(D-H) | d(H...A) | d(D...A)   | <(DHA) |
|--------------------|--------|----------|------------|--------|
| N(1)-H(1)...O(1)#1 | 0.88   | 2.04     | 2.9146(17) | 172.9  |

Symmetry transformations used to generate equivalent atoms:

#1 -x+2,-y+1,-z+1

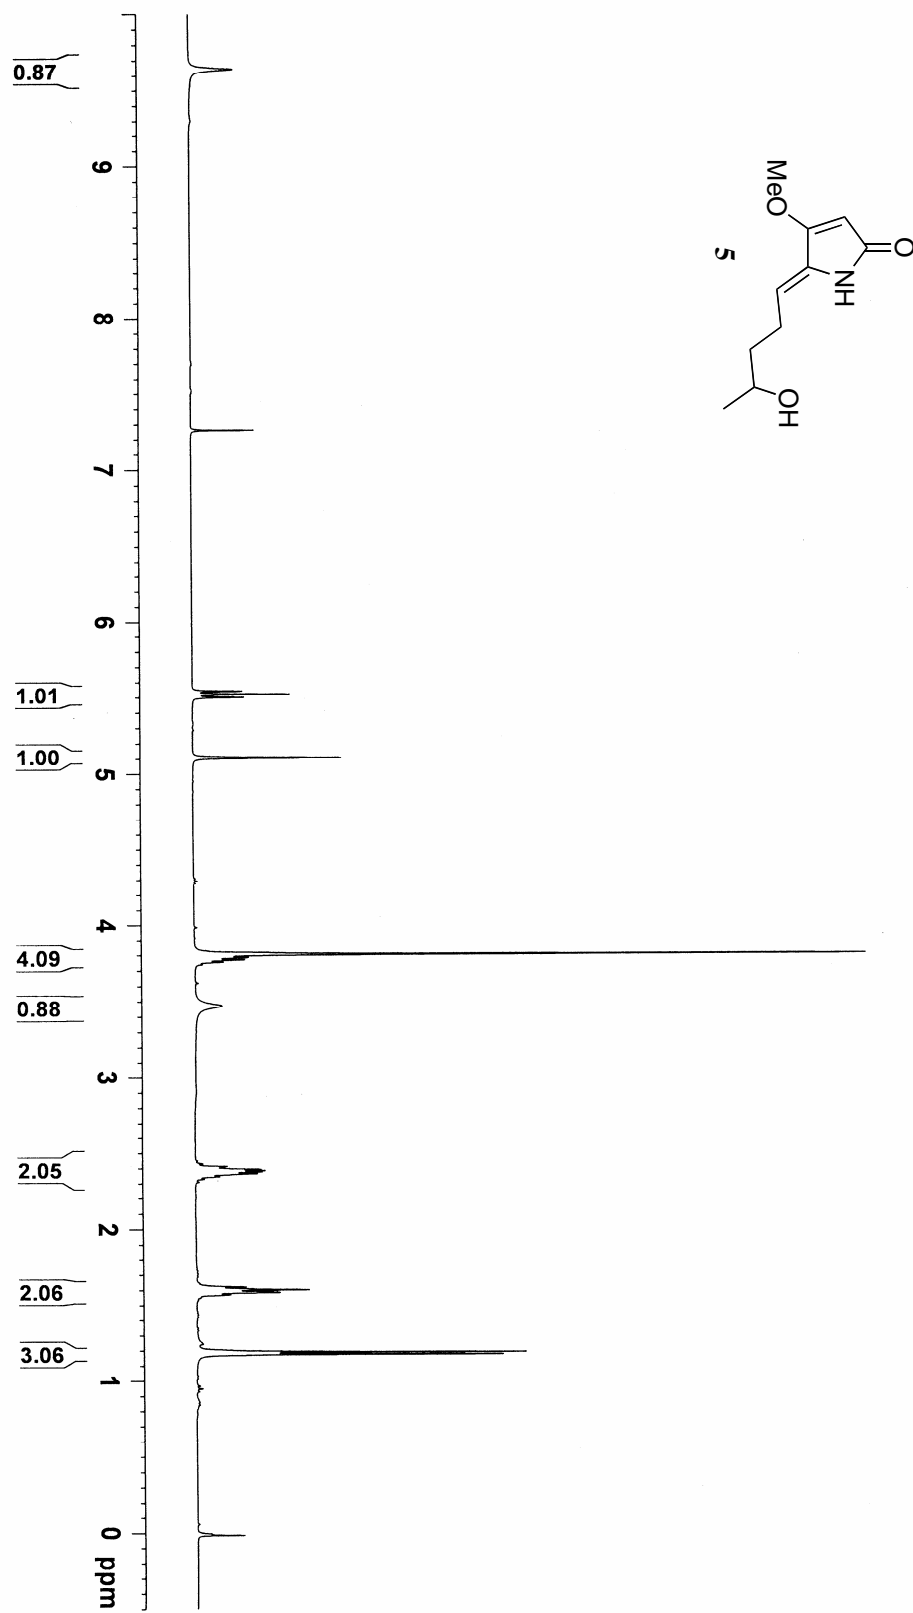

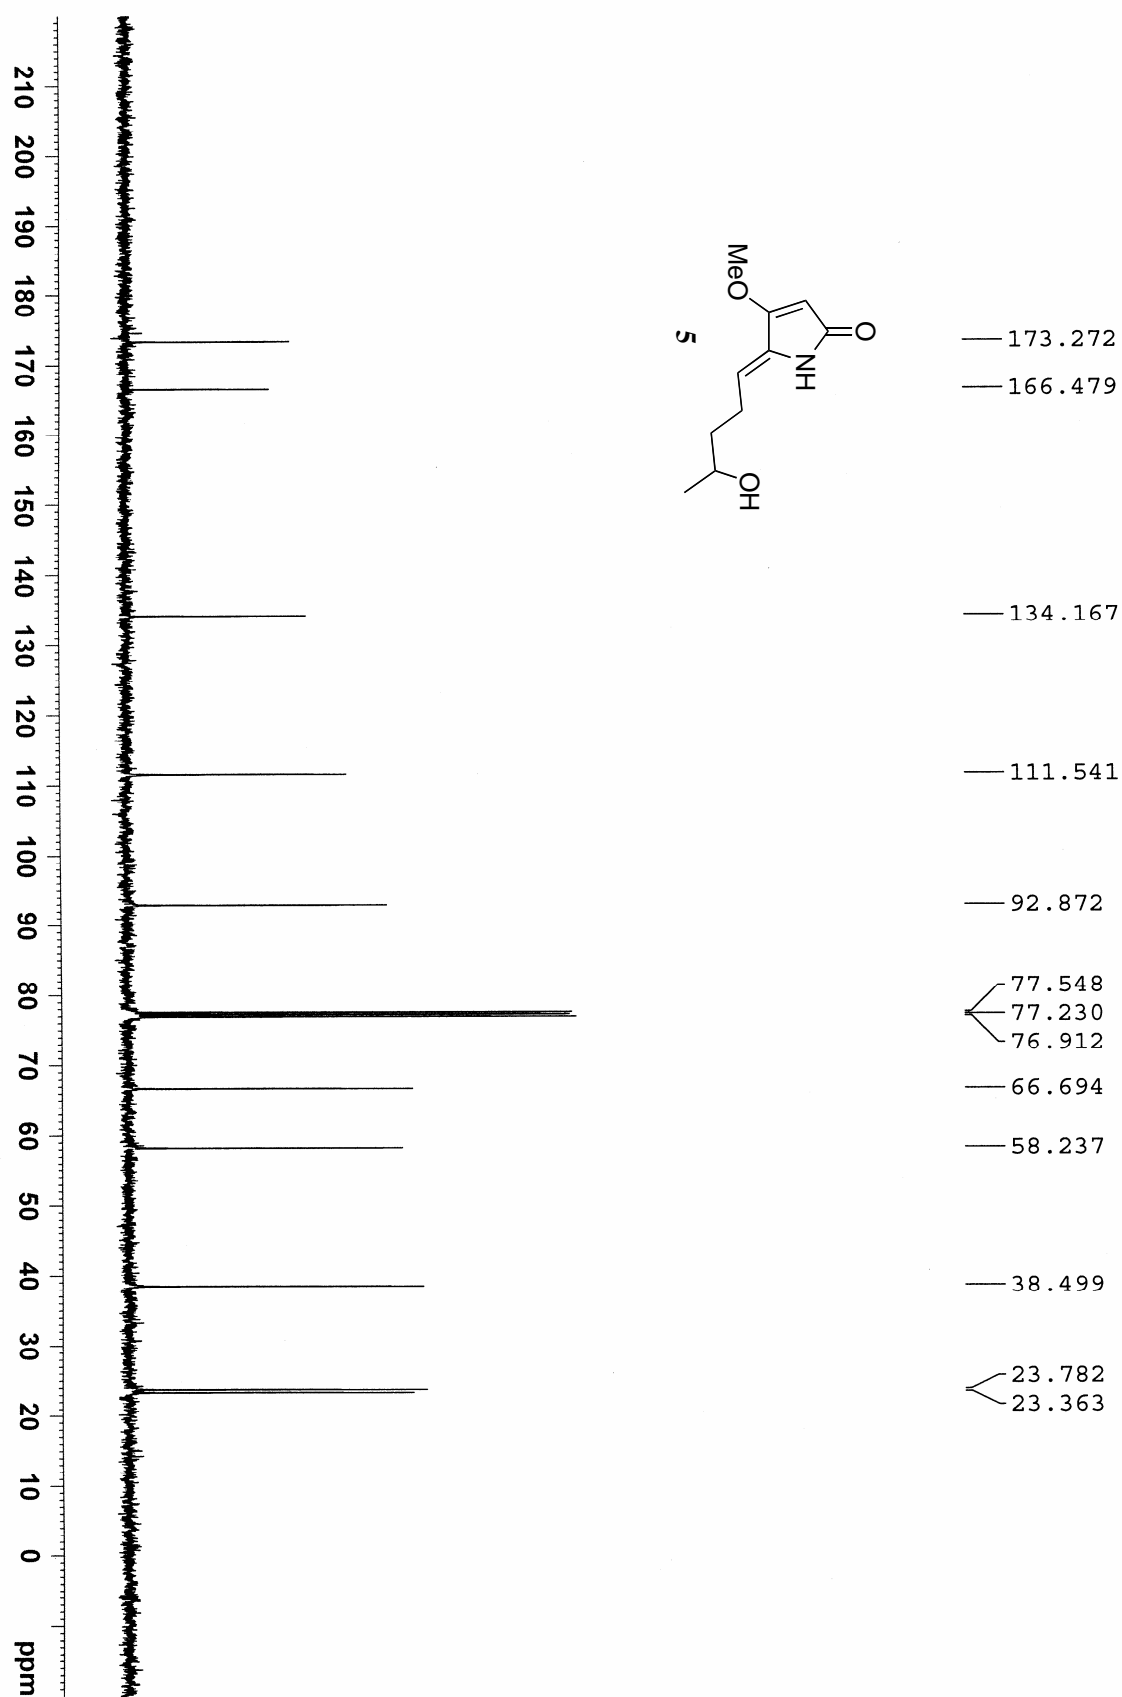

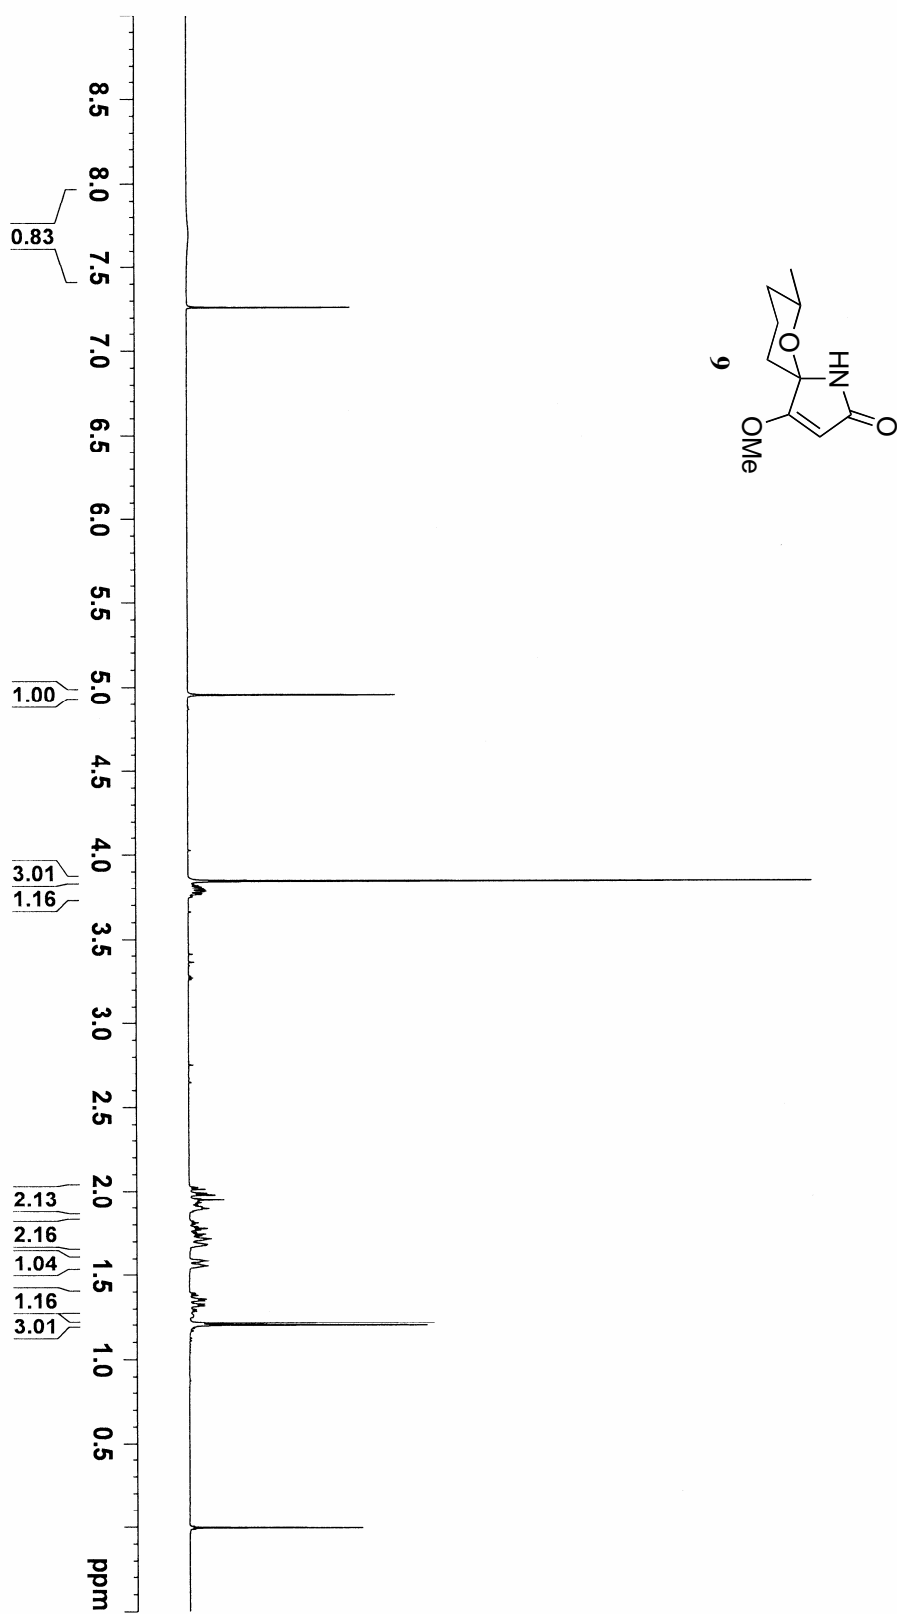

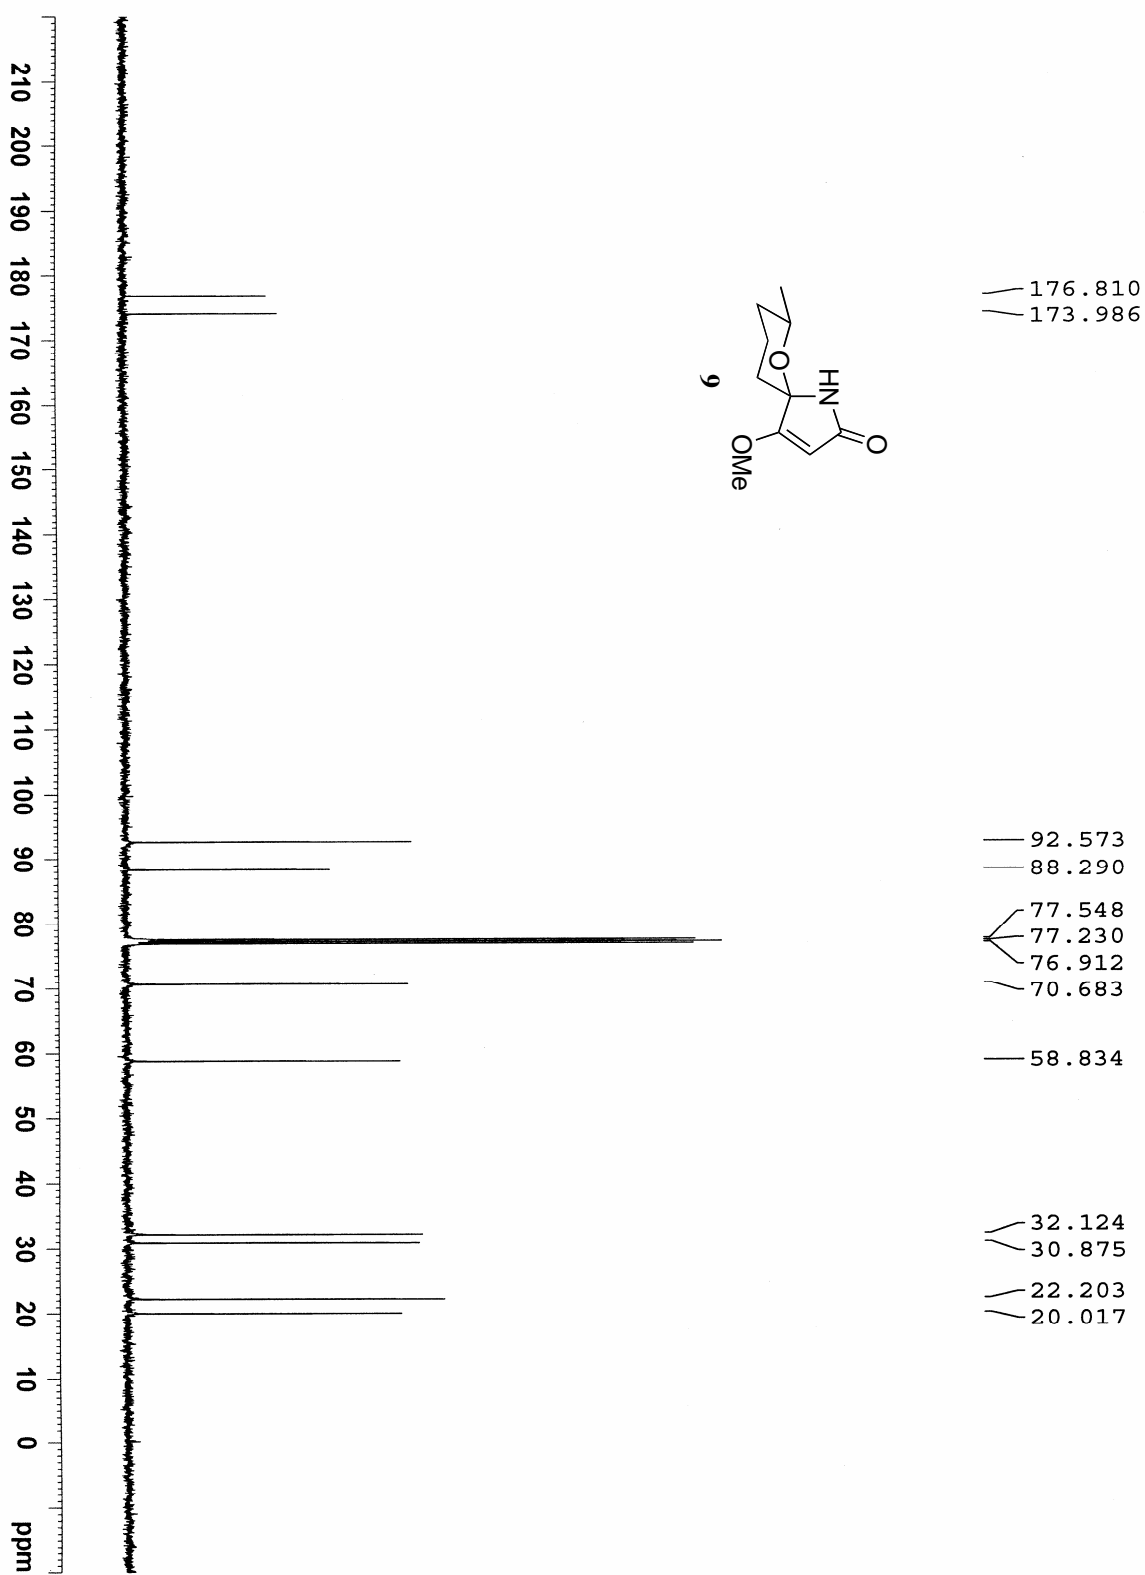

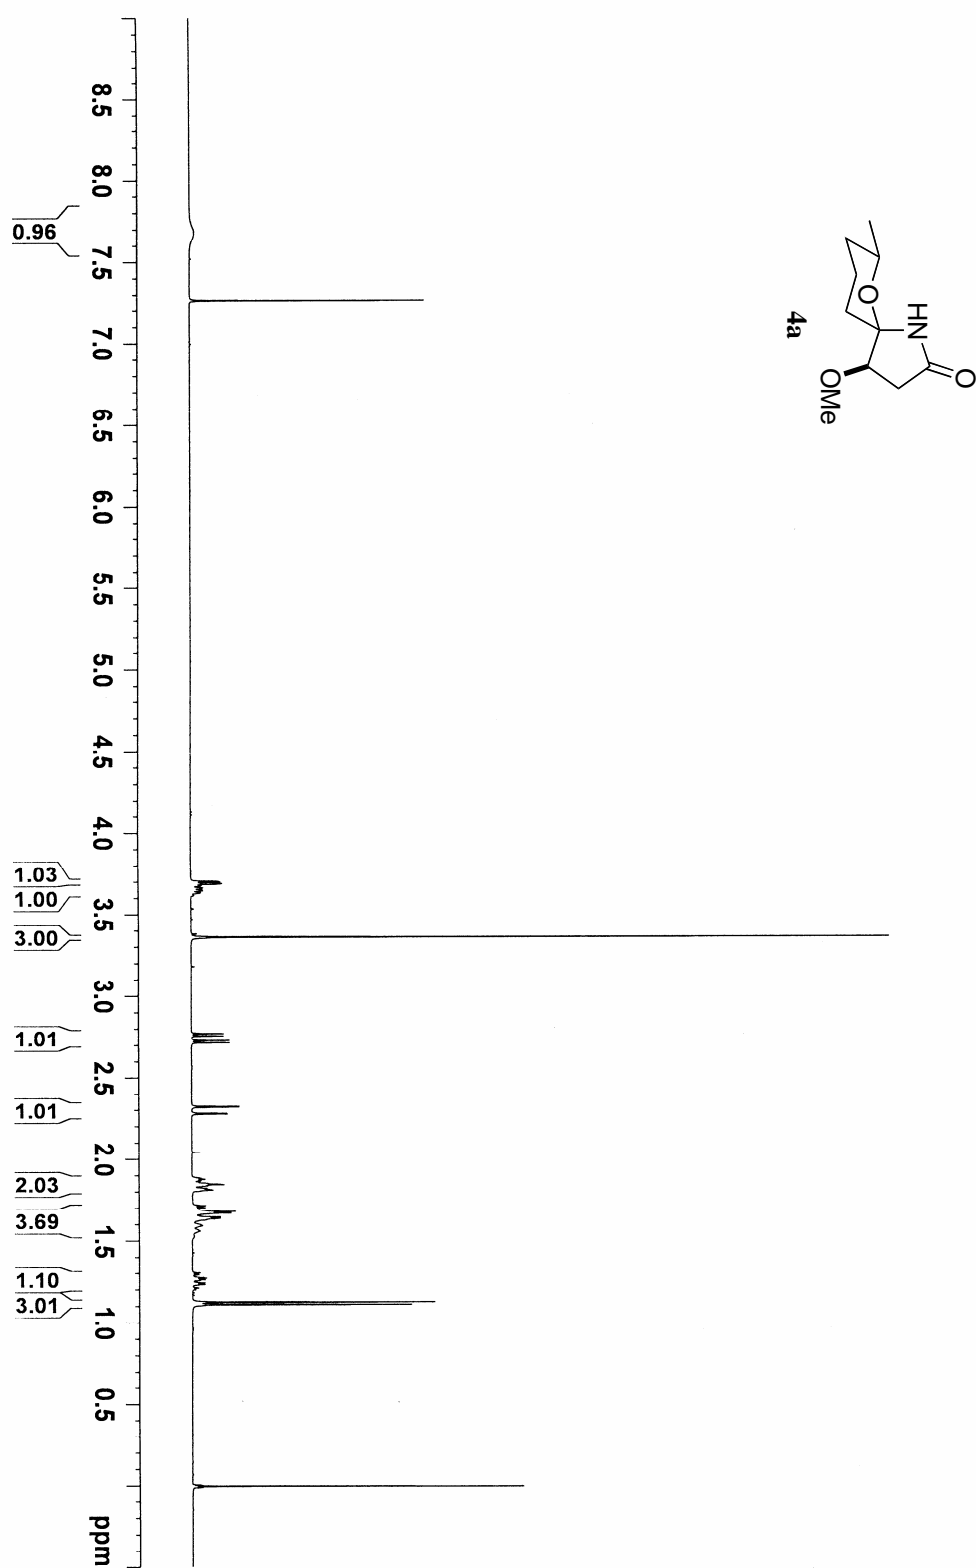

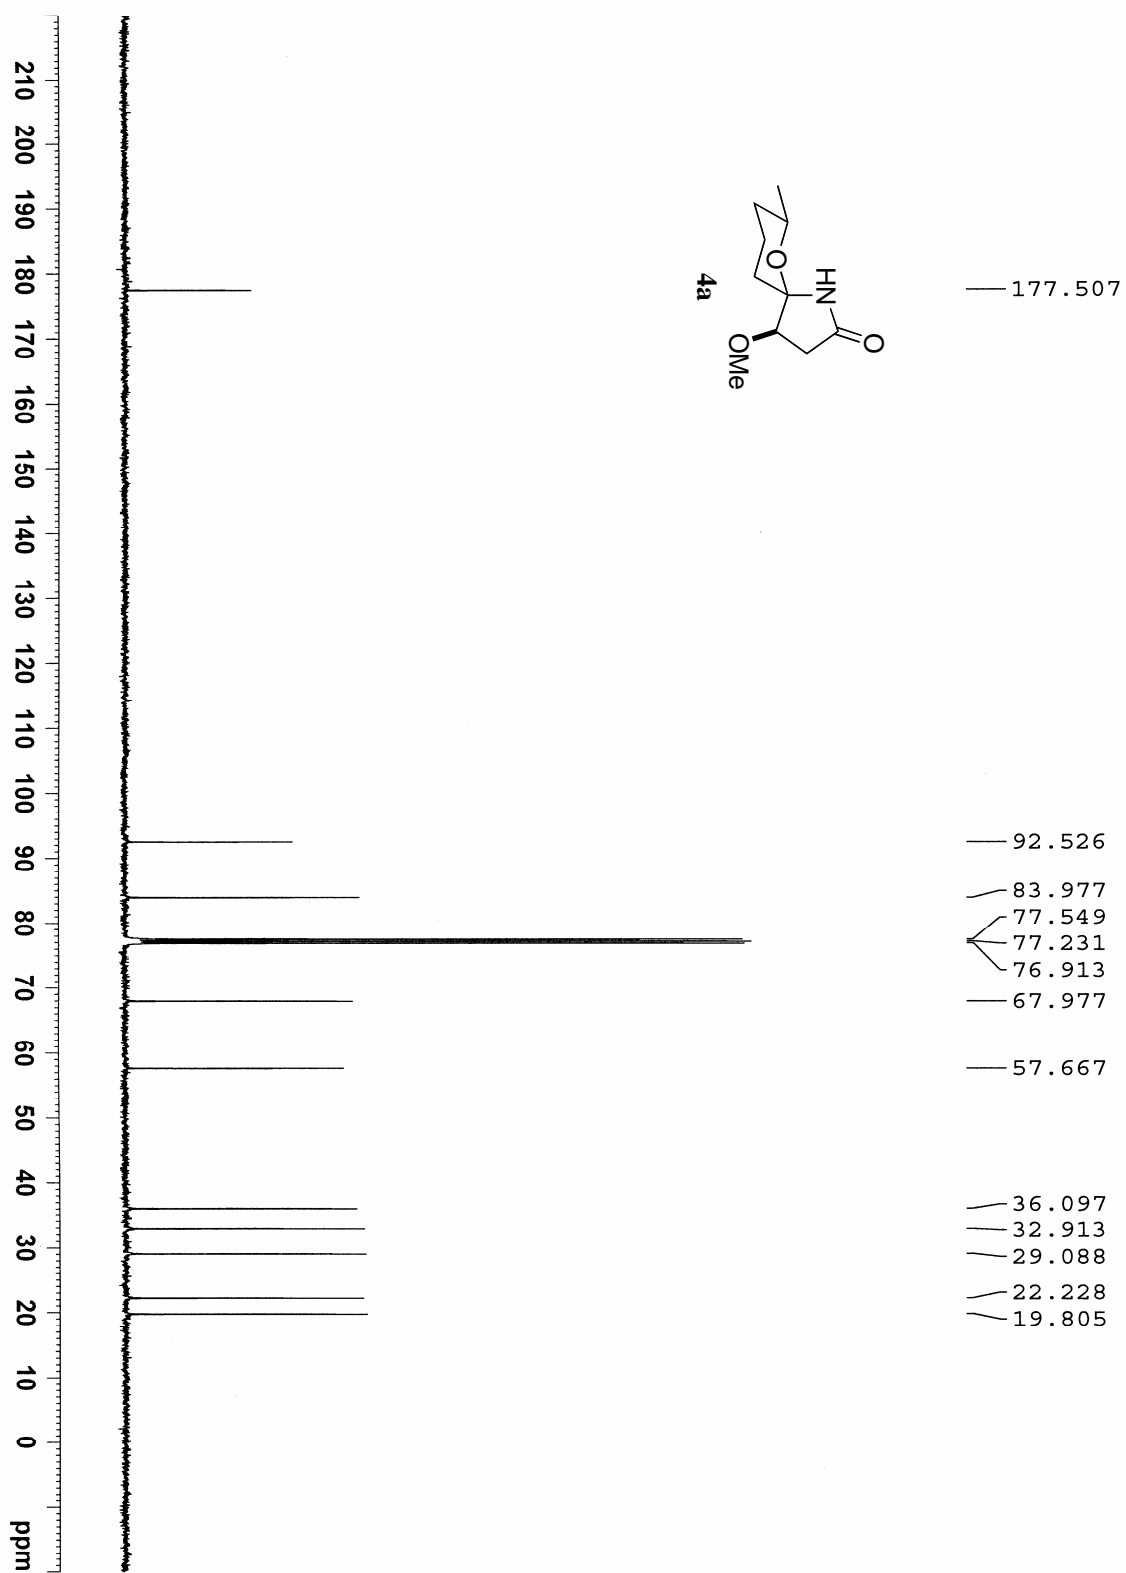

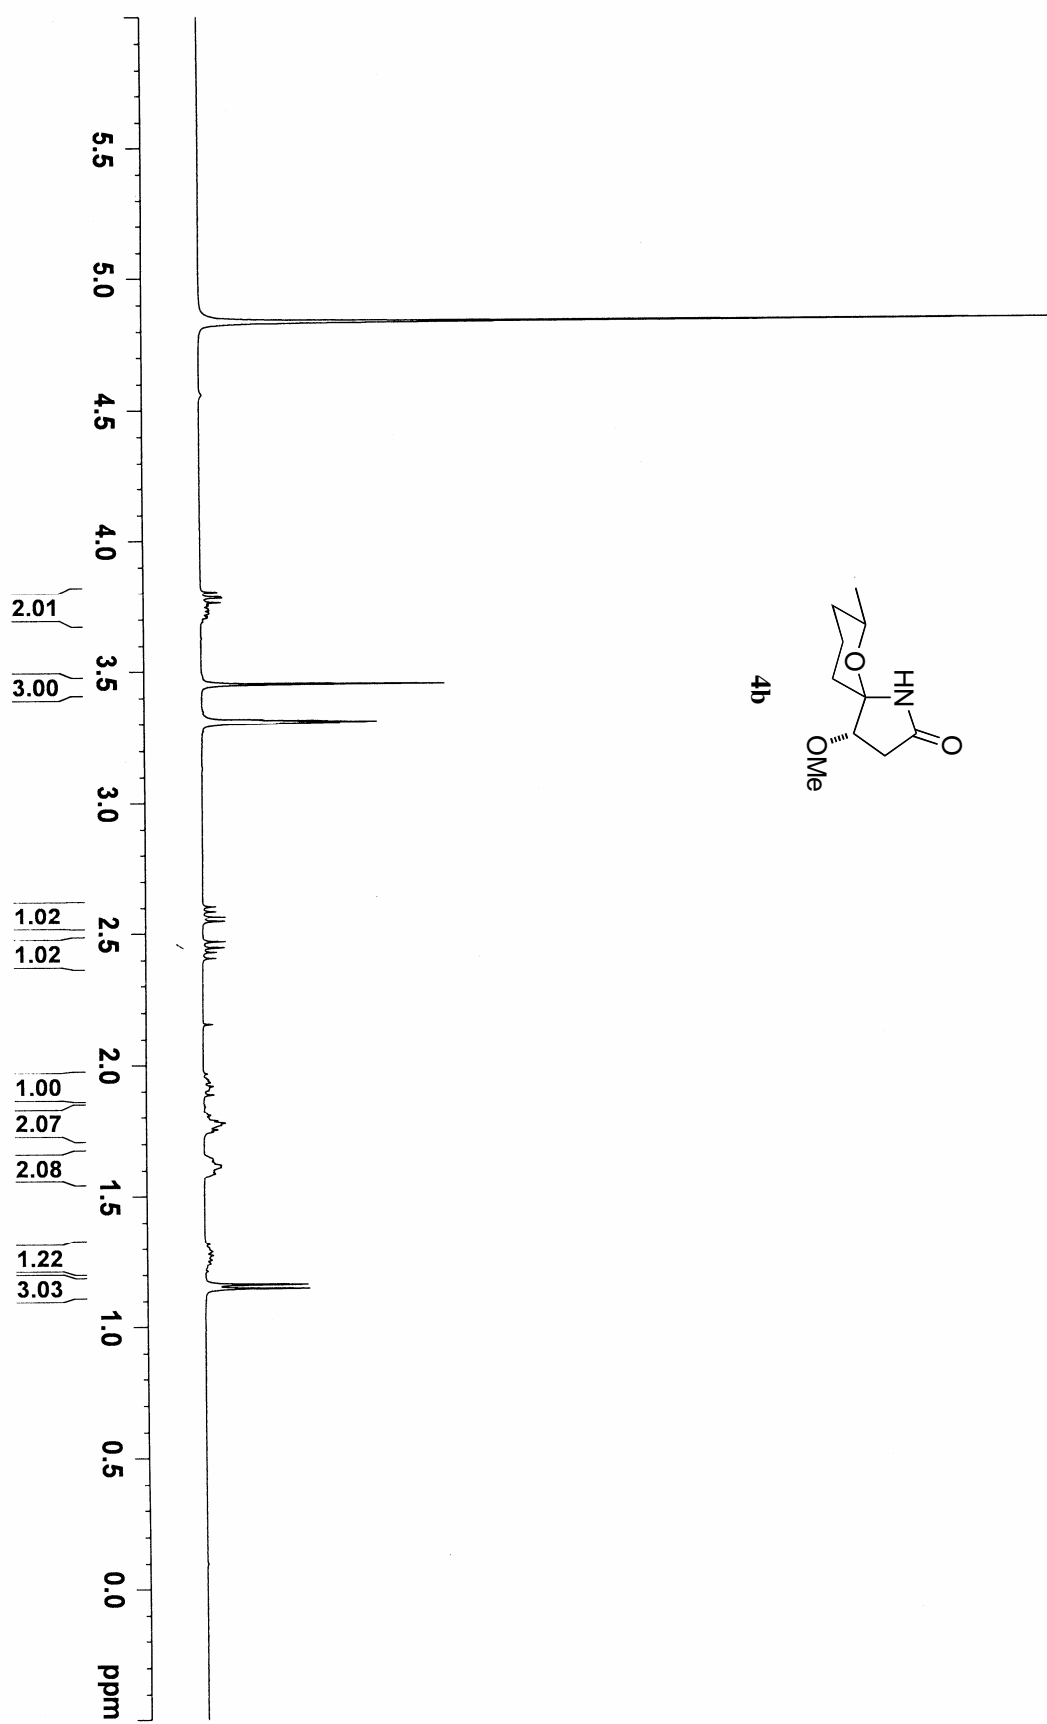



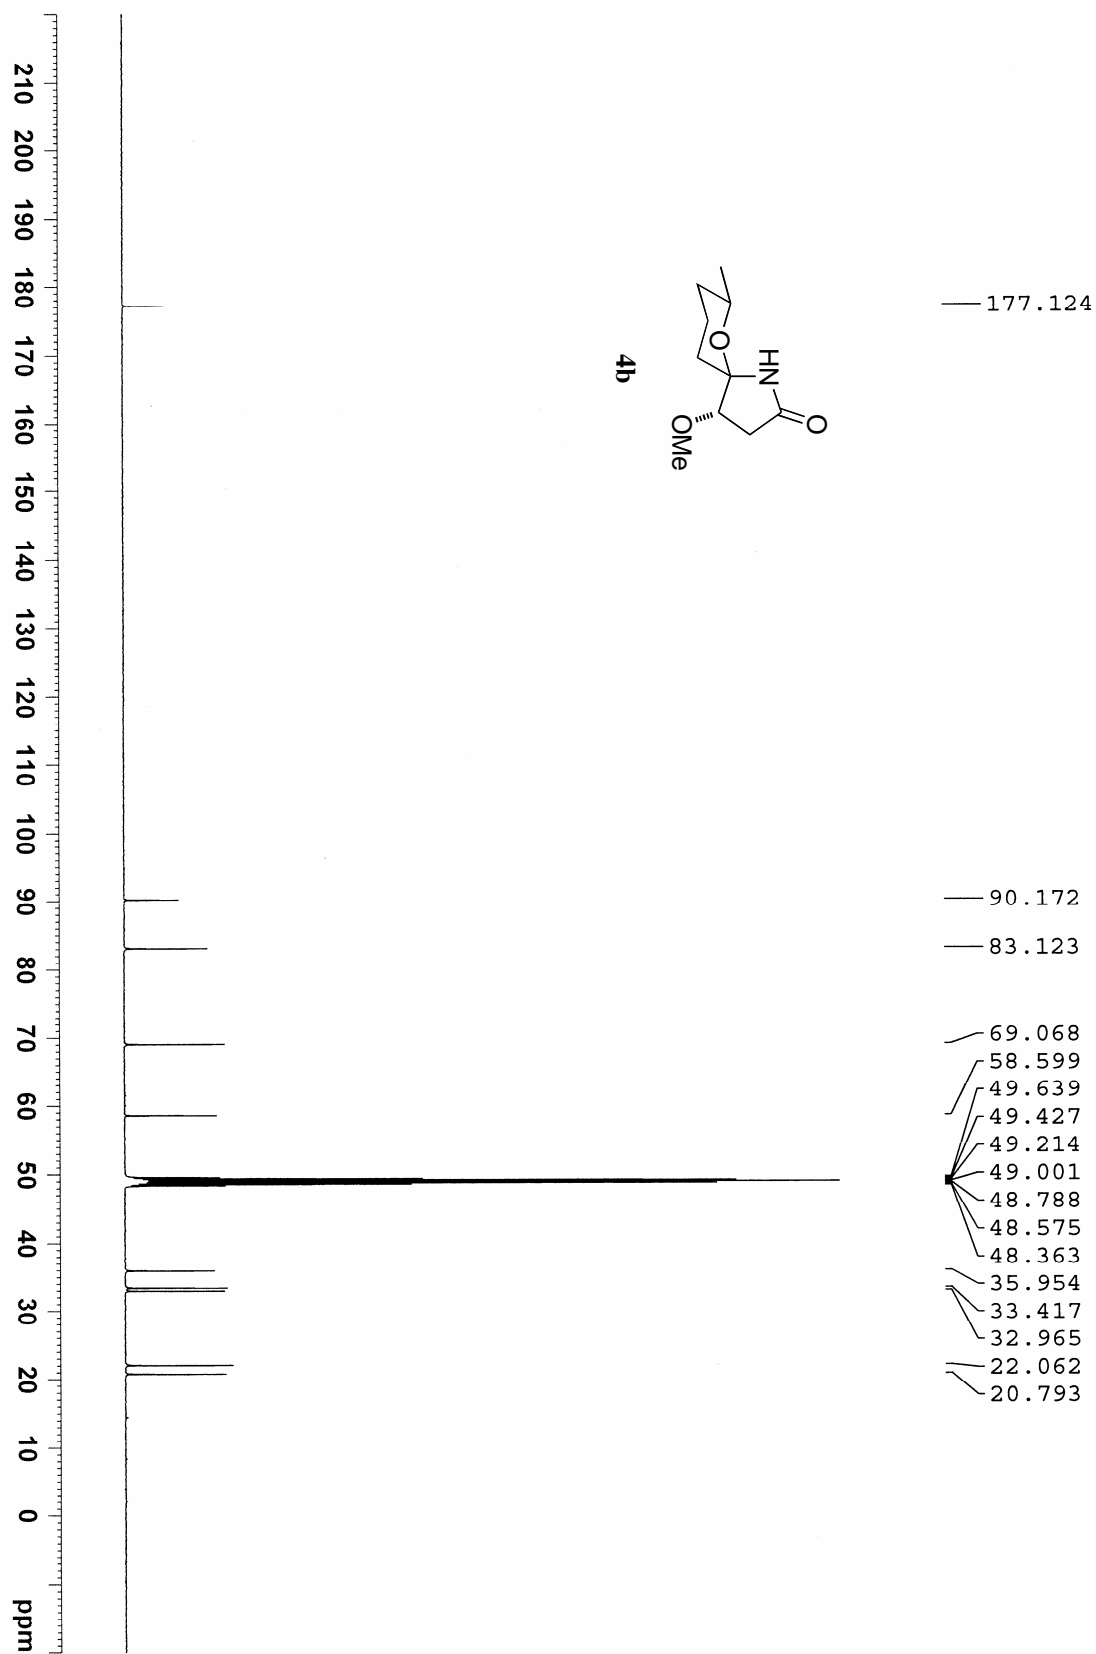

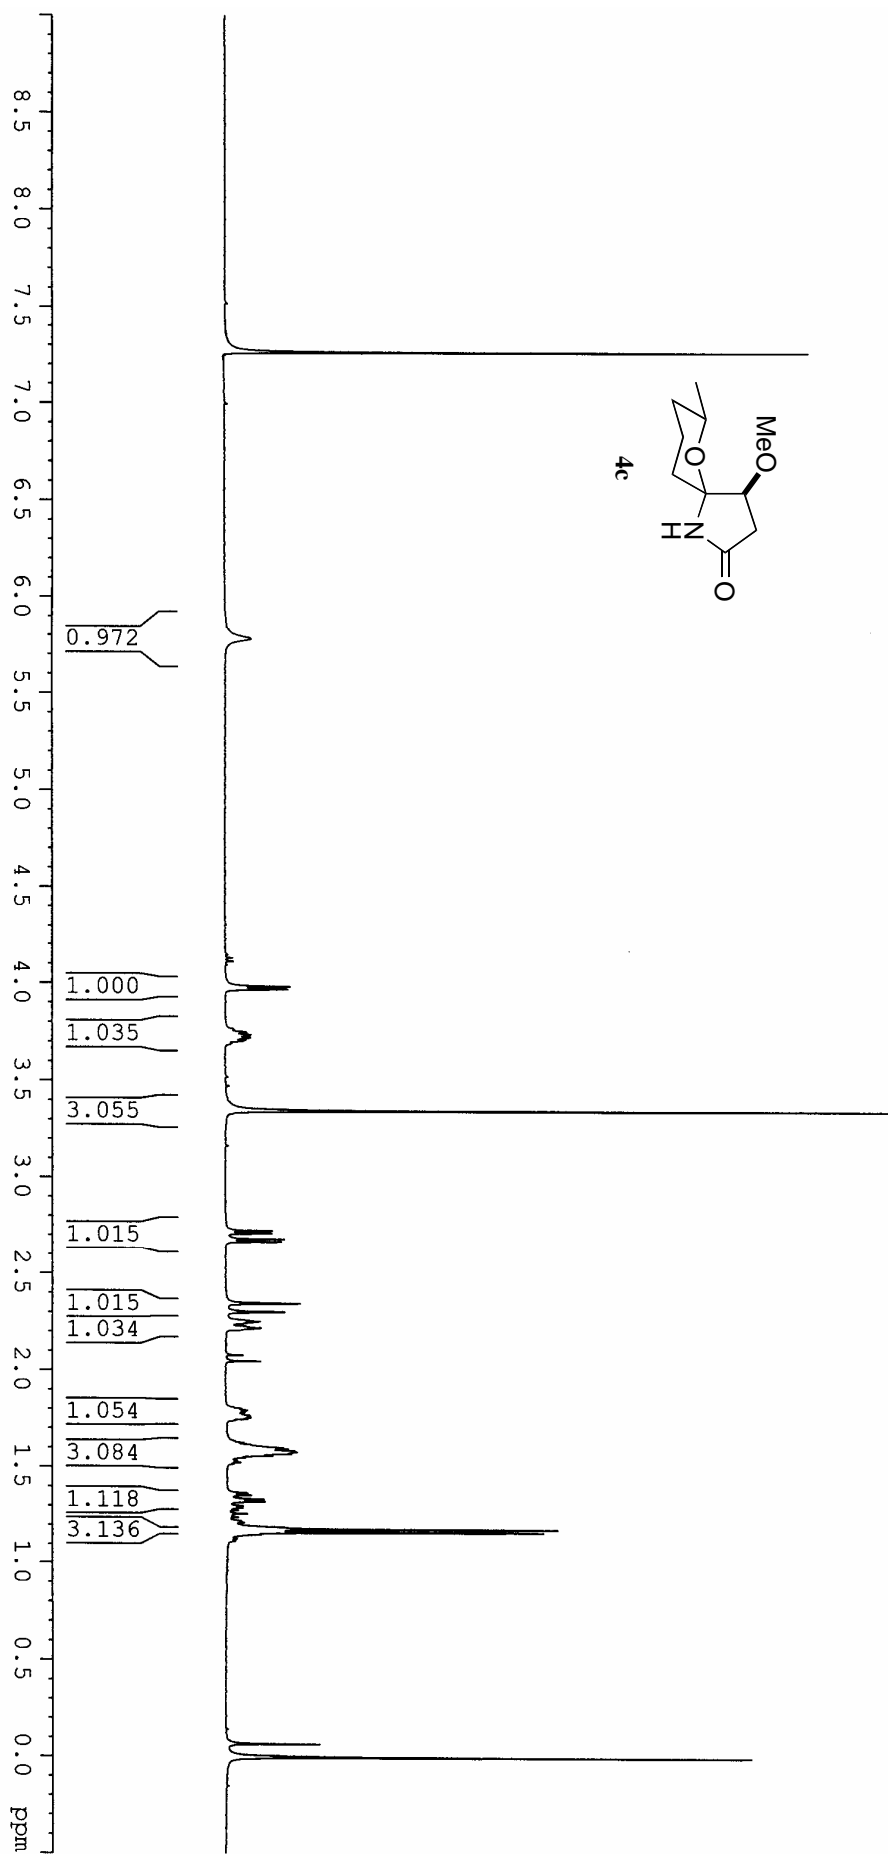

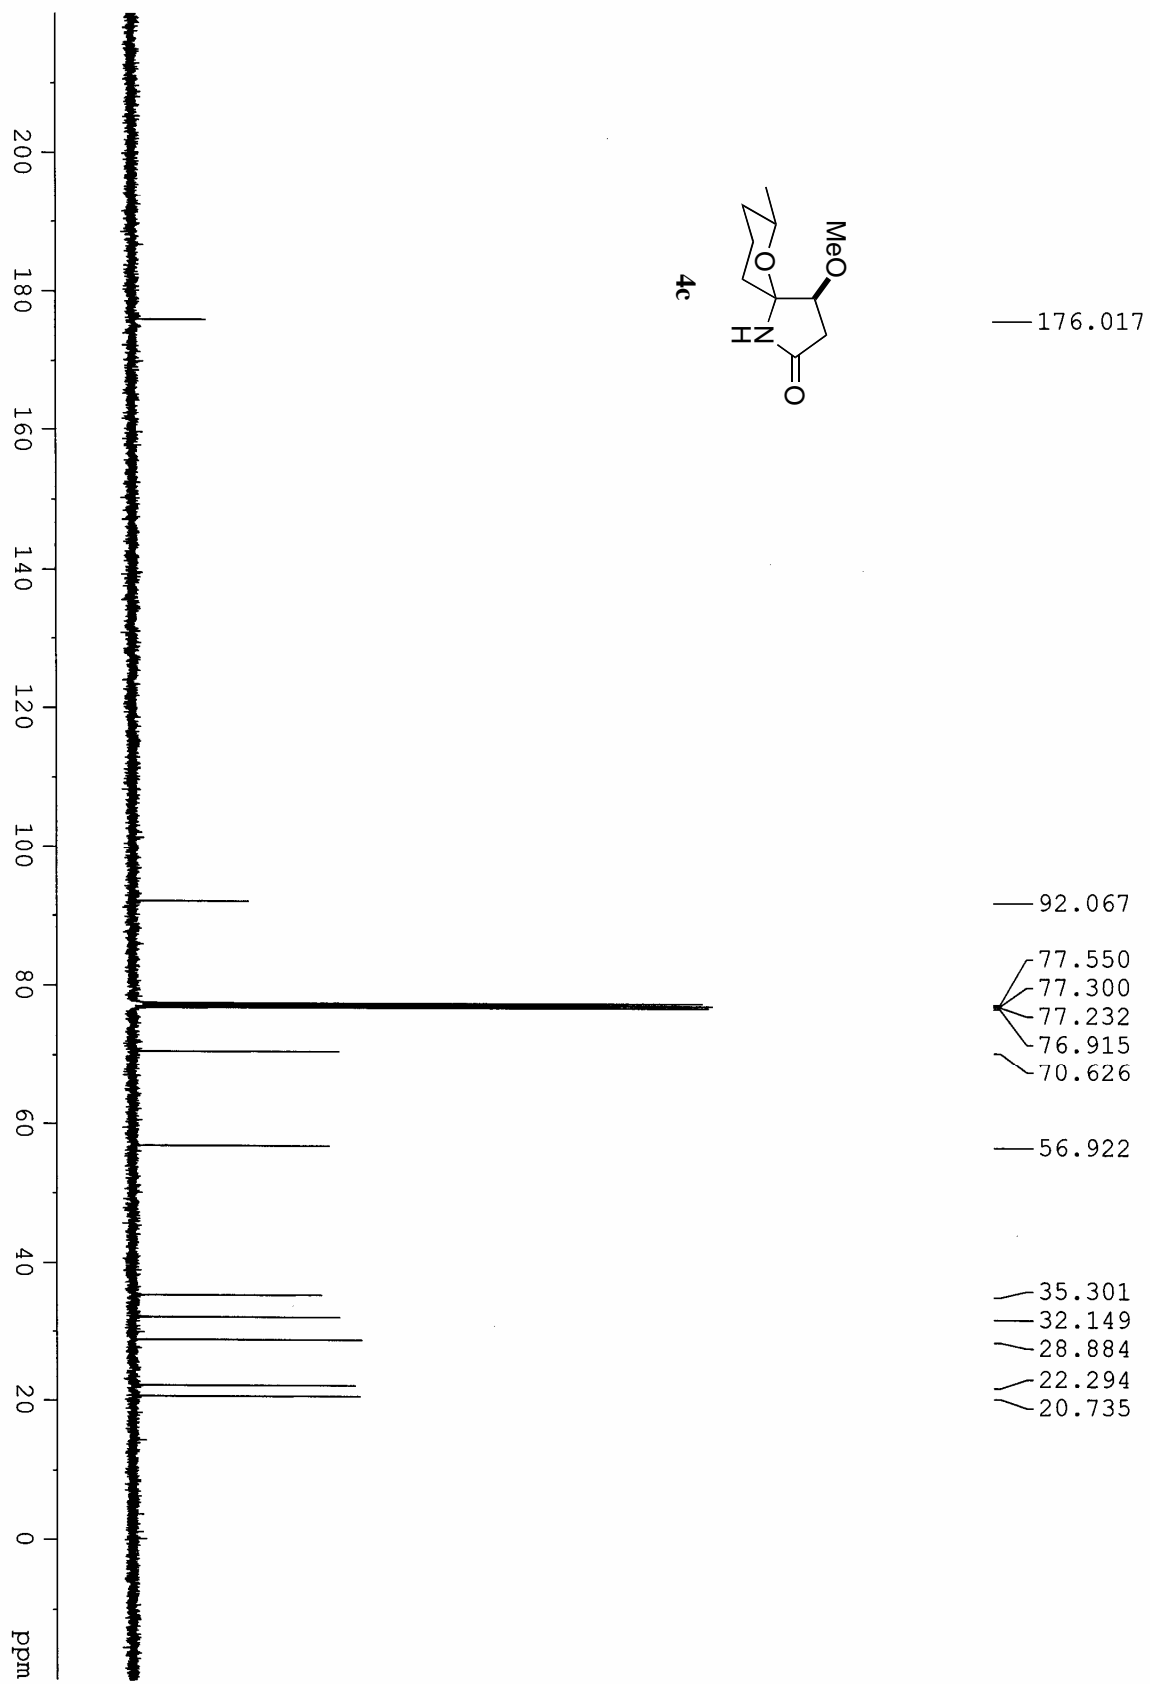

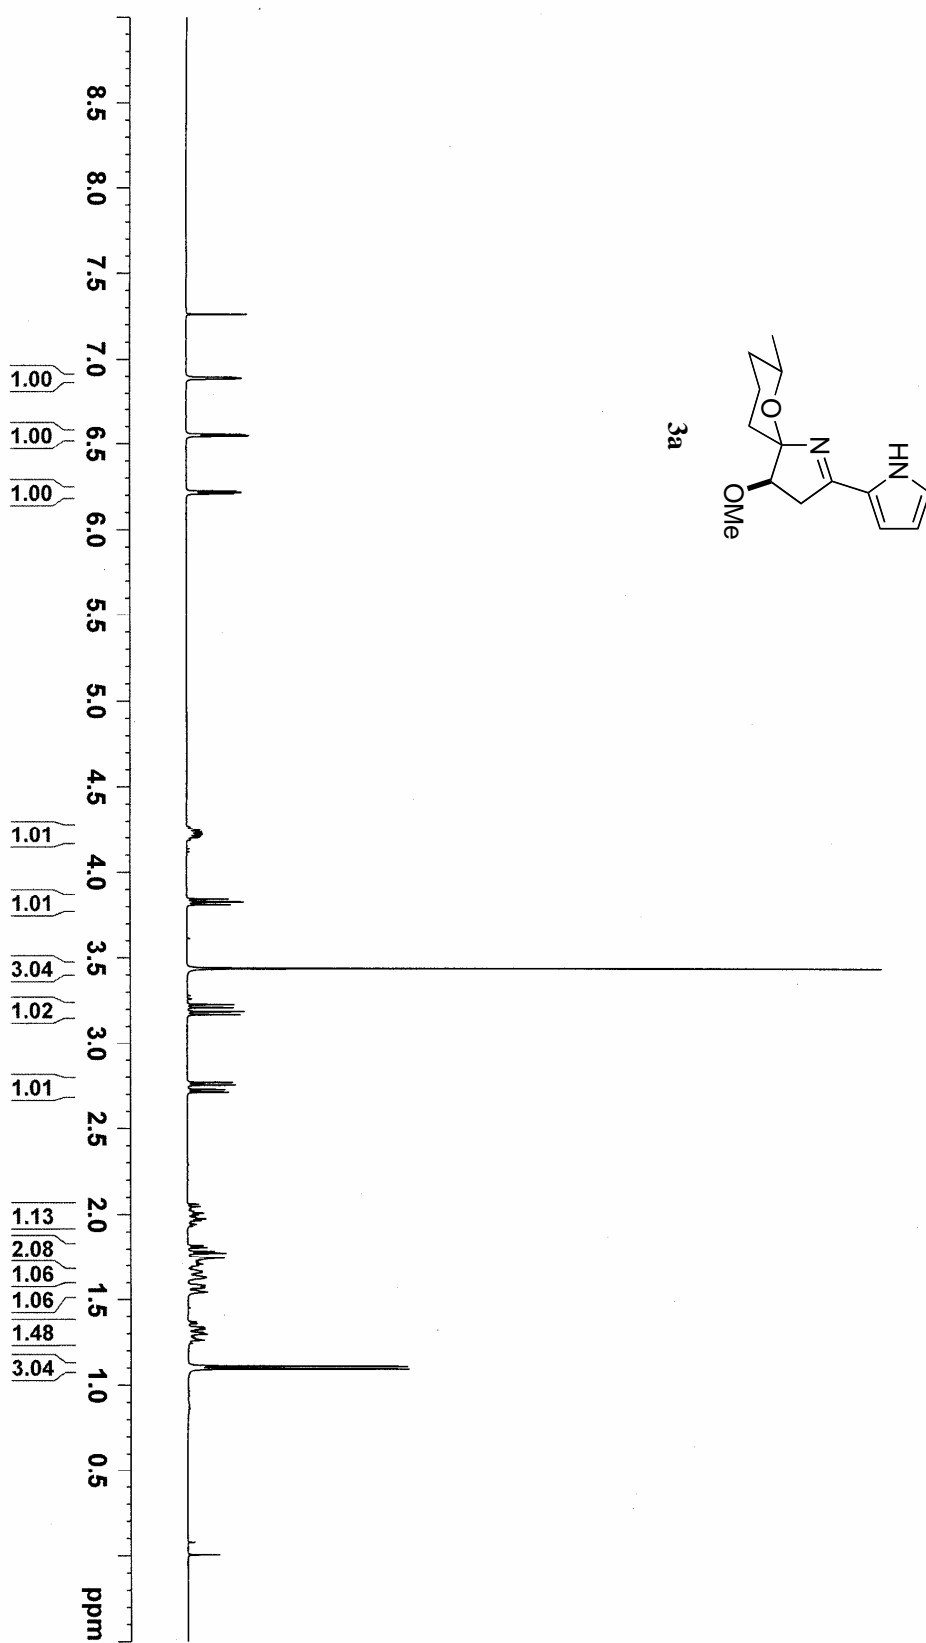

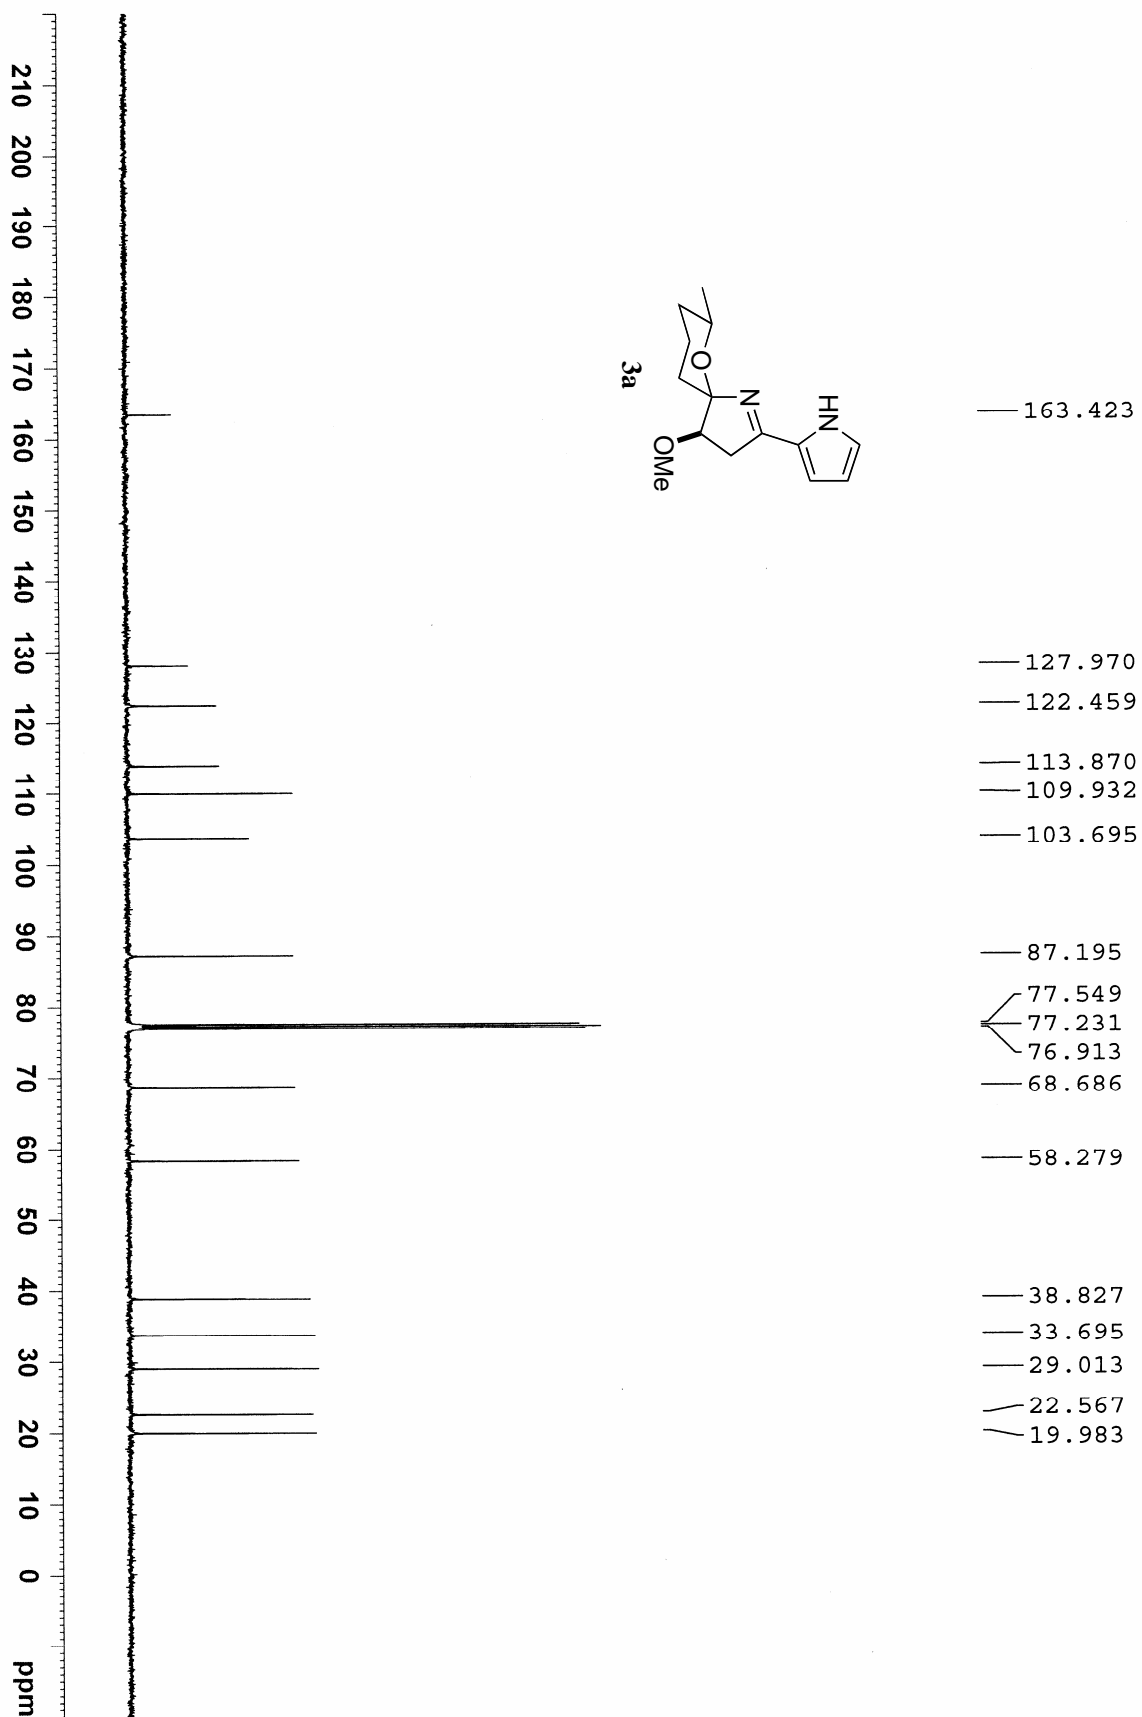

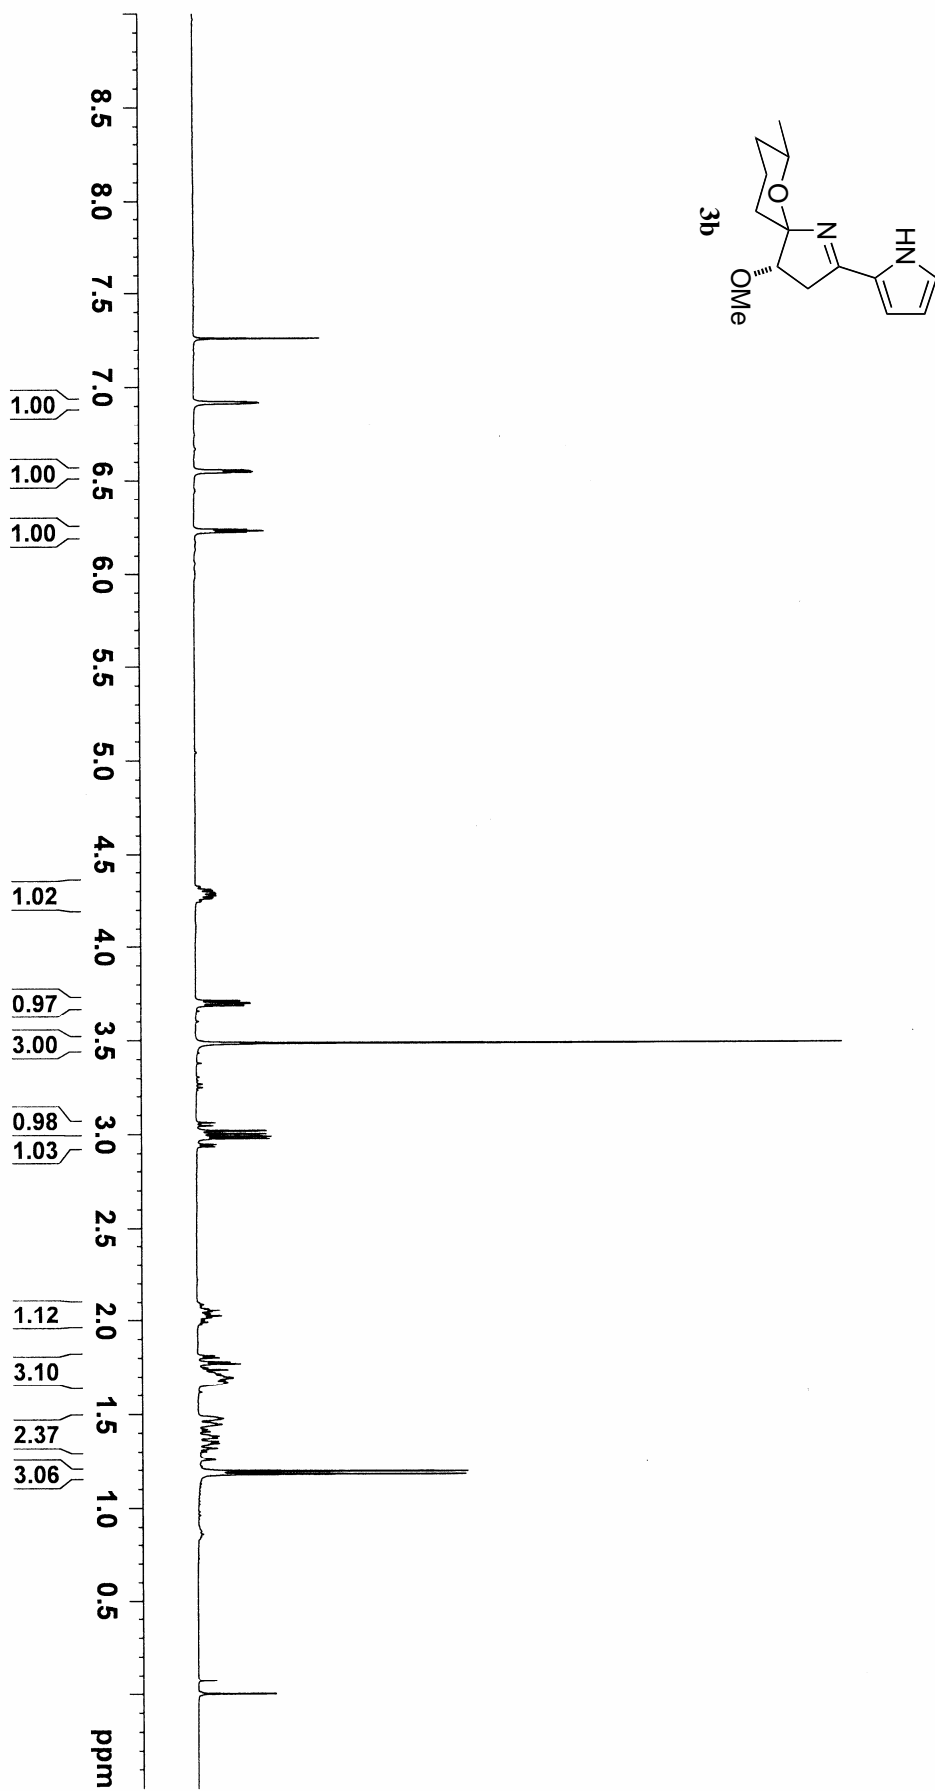

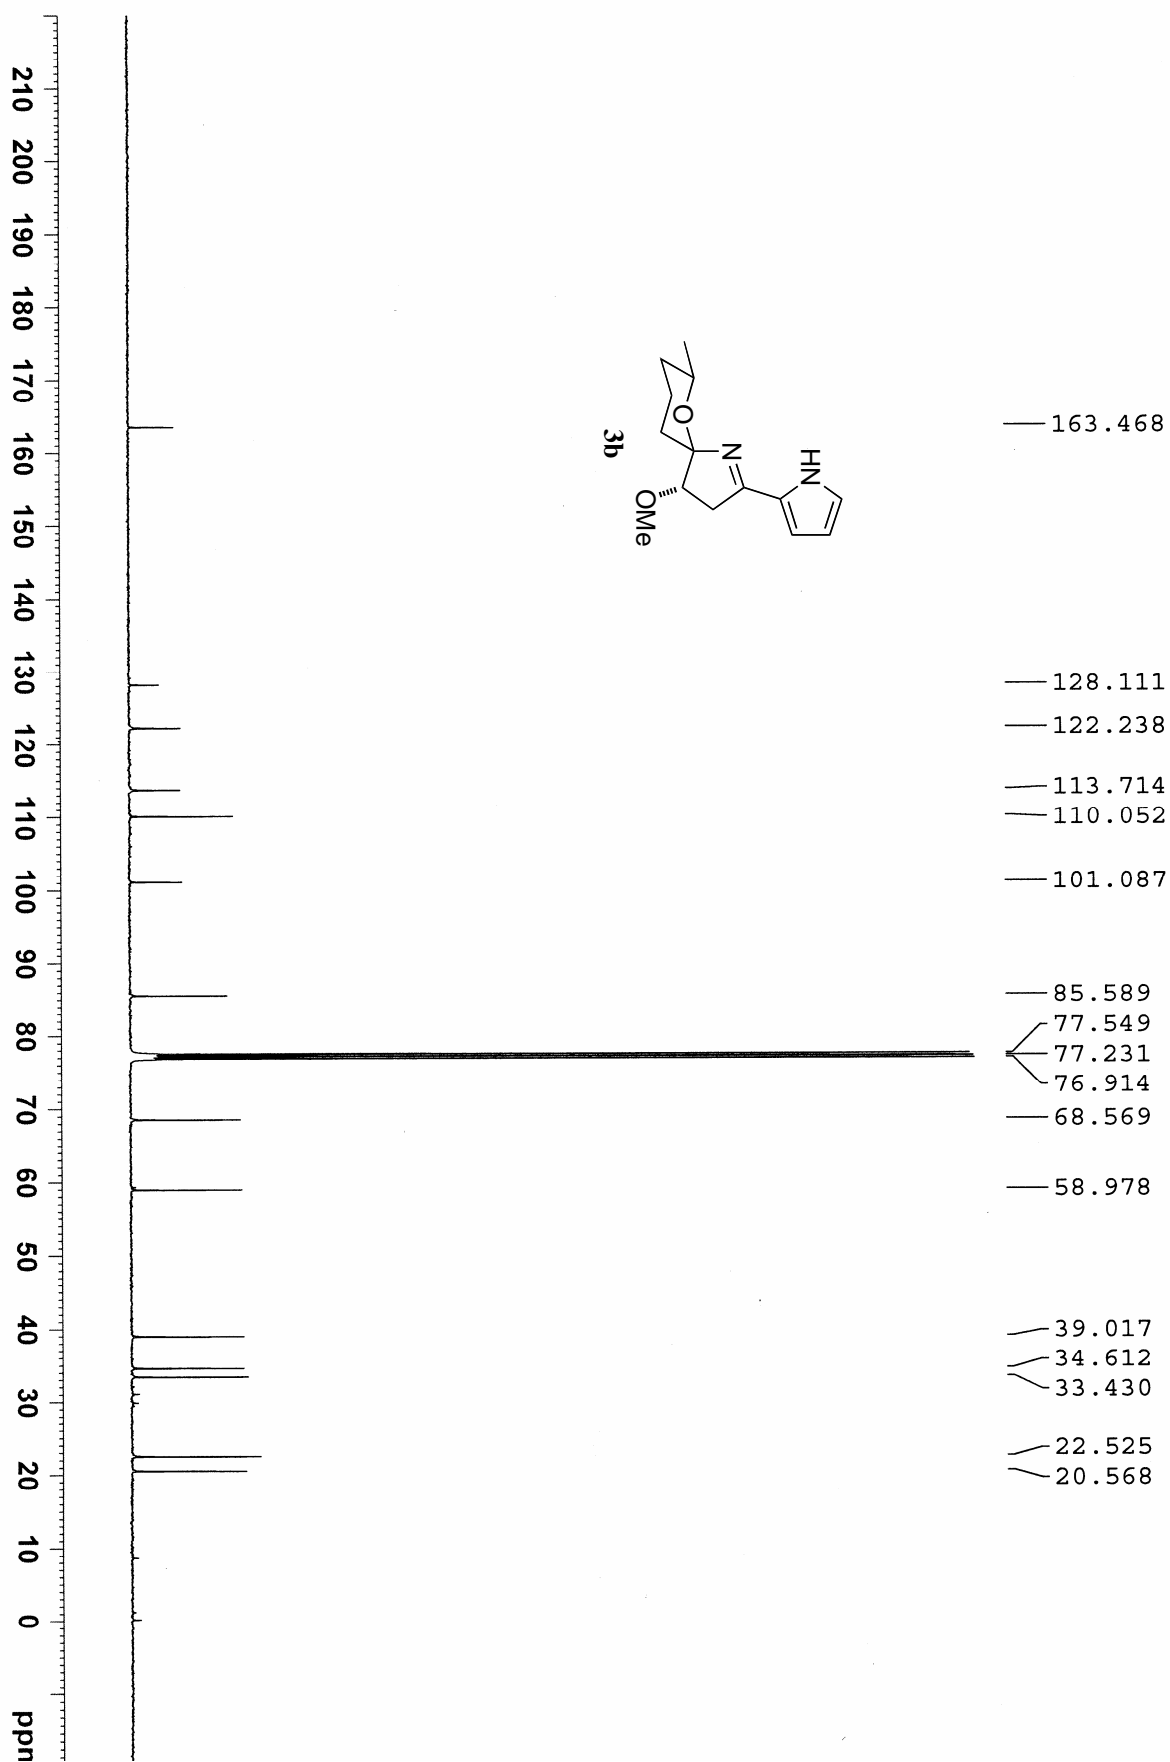

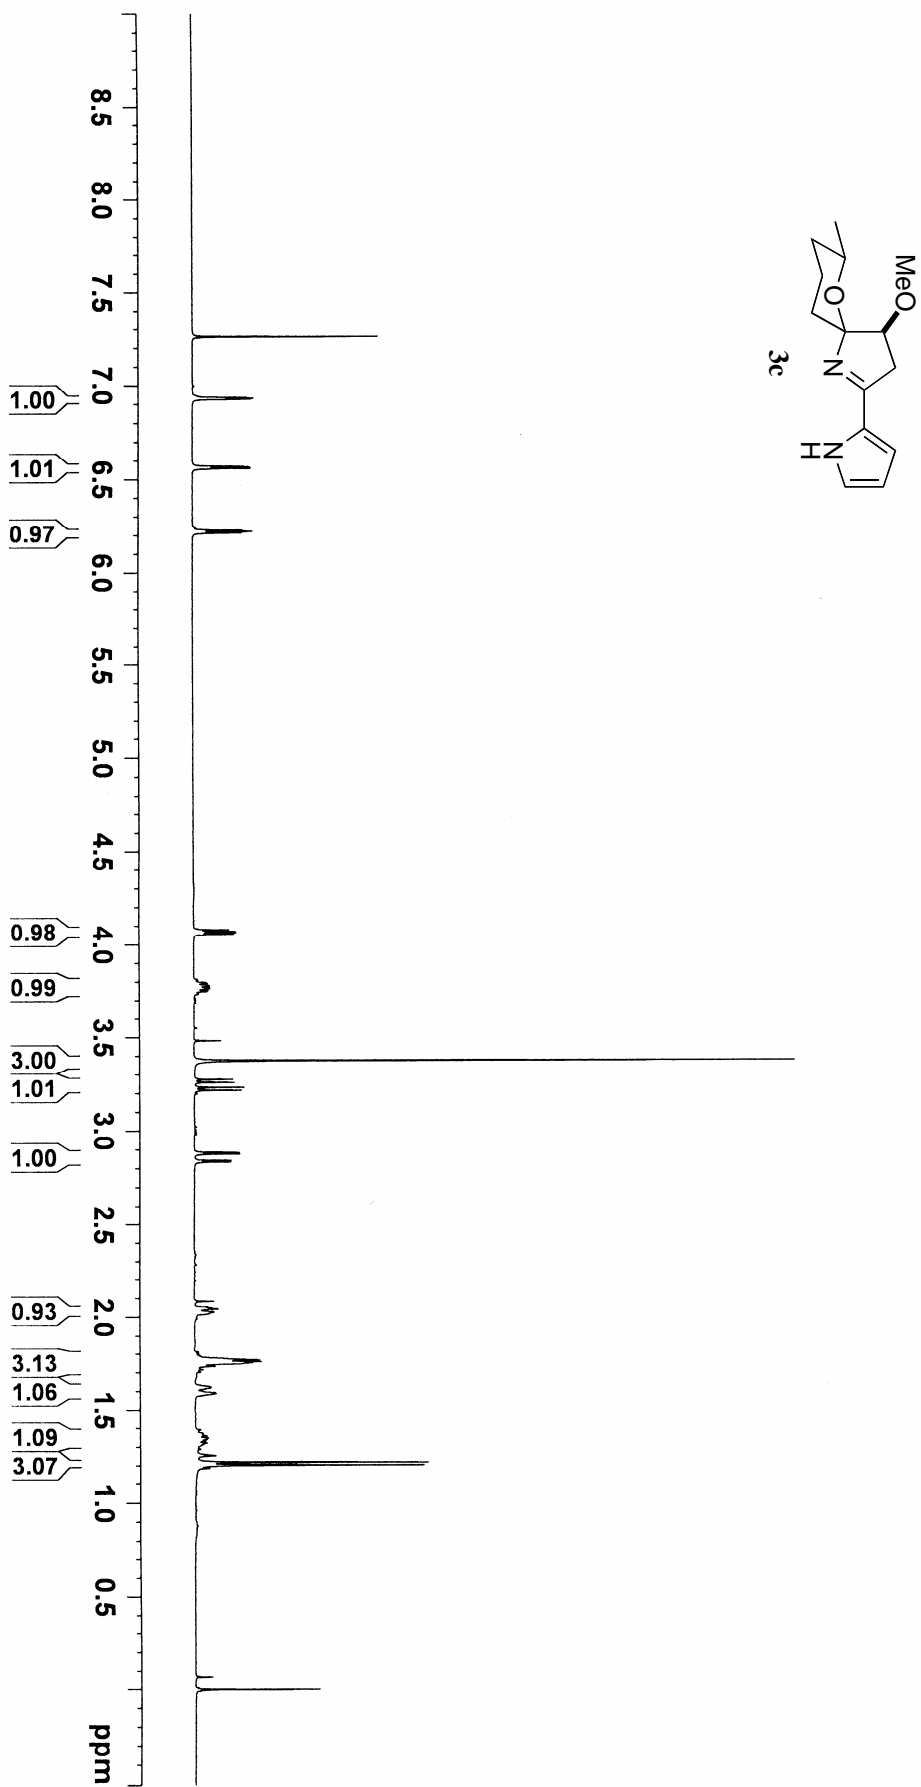



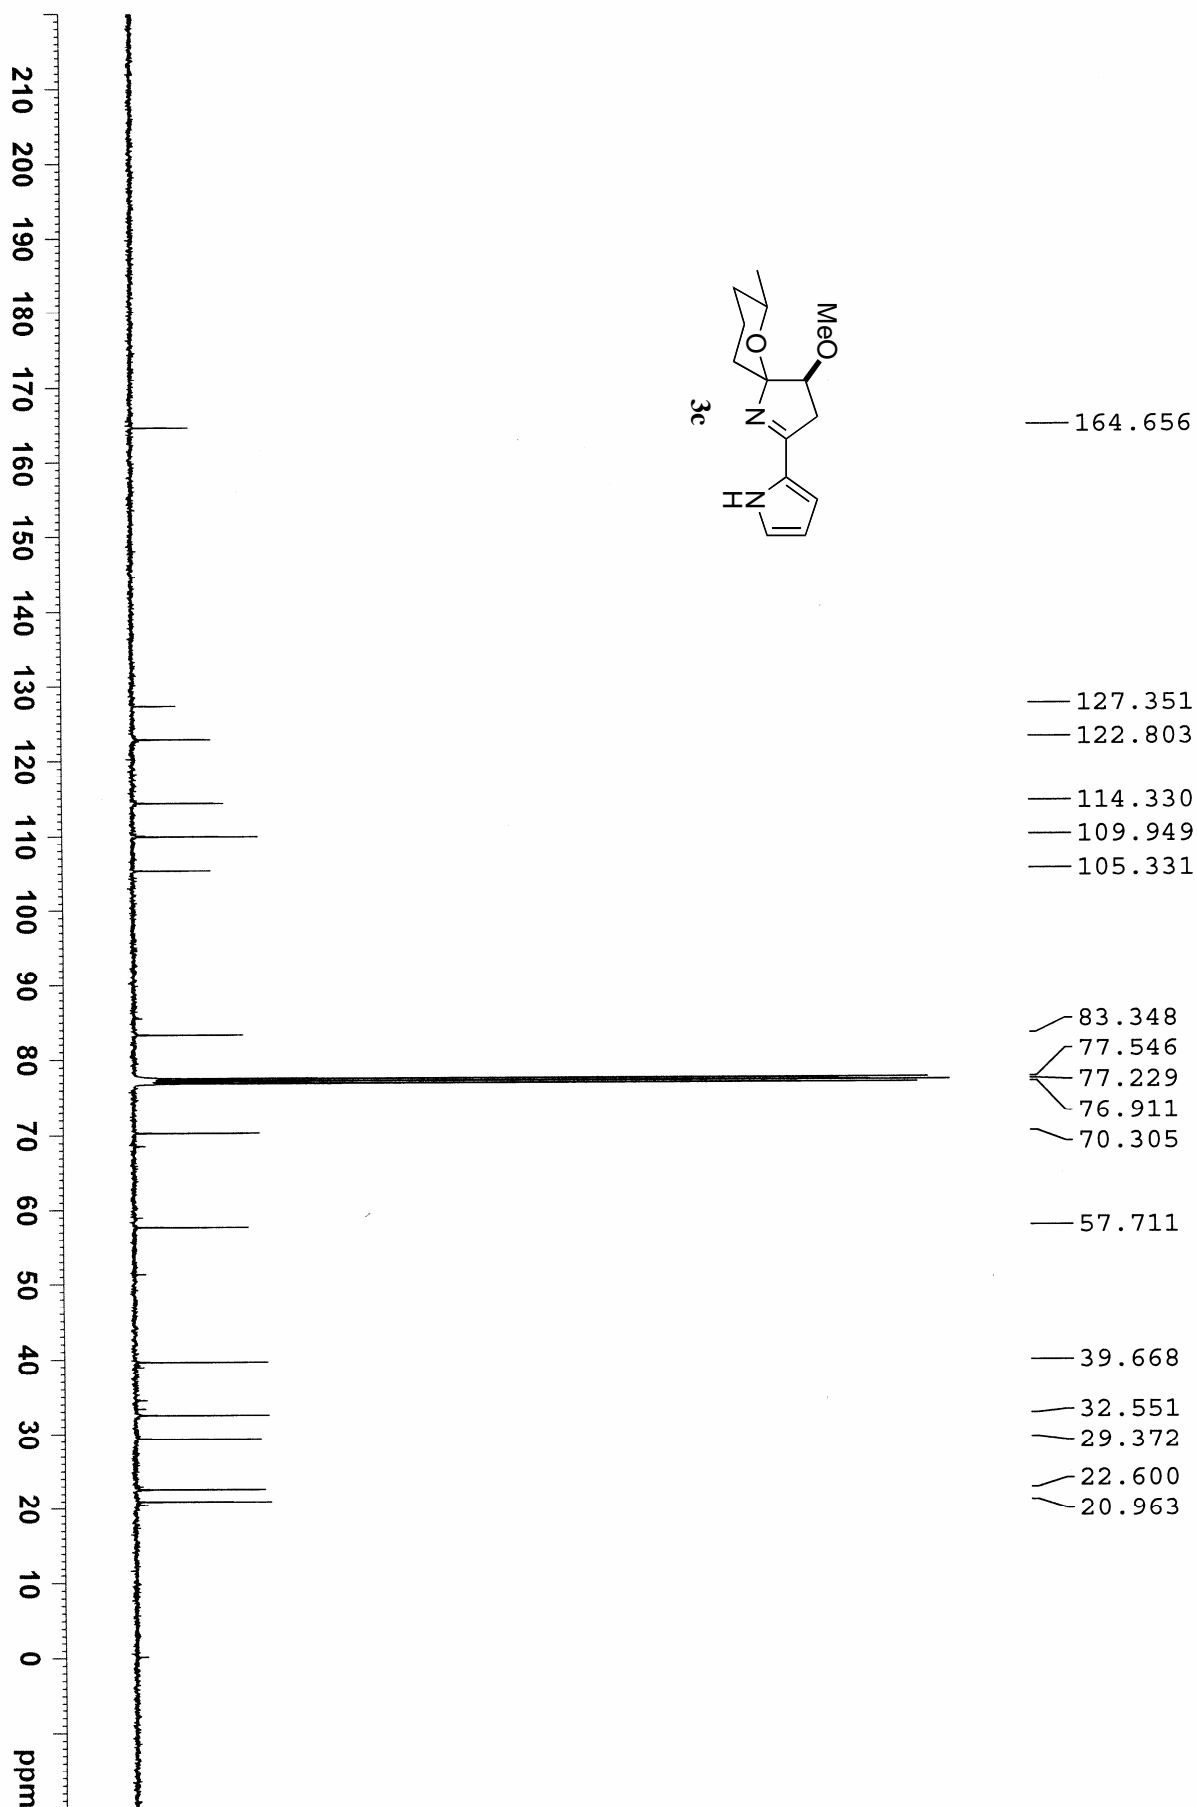

Supplement: c3ob40208h.pdf [file c3ob40208h.pdf]
